# Supplementary material for: Long-lived charge separated state and thermally activated delayed fluorescence in anthraquinone-phenoxazine electron donor–acceptor dyads
Source: Royal Society of Chemistry journal article supplement (doi:10.1039/d2cc01958b), 2022-01-01
Supplement: d2cc01958b1.pdf [file d2cc01958b1.pdf]

## Electronic Supplementary Information:

# Long-Lived Charge Separated State and Thermally Activated Delayed Fluorescence in Anthraquinone-Phenoxazine Electron Donor- Acceptor Dyads

Xiaoyu Zhao,<sup>a,b</sup> and Jianzhang Zhao<sup>\*a,b</sup>

<sup>a</sup> State Key Laboratory of Chemistry and Utilization of Carbon Based Energy Resources;  
College of Chemistry, Xinjiang University, Urumqi 830017, P. R. China.

<sup>b</sup> State Key Laboratory of Fine Chemicals, School of Chemical Engineering, Dalian University  
of Technology, Dalian 116024, P. R. China. \*E-mail: zhaojzh@dlut.edu.cn

## Index

|                                                                       |          |
|-----------------------------------------------------------------------|----------|
| 1. Experimental Section.....                                          | Page S3  |
| 2. Synthesis of the Compounds.....                                    | Page S5  |
| 3. Molecular Structure Characterization Data.....                     | Page S8  |
| 4. Crystallographic Data.....                                         | Page S17 |
| 5. Steady State UV-Vis Absorption Spectra.....                        | Page S18 |
| 6. Fluorescence Spectra and Fluorescence Lifetime.....                | Page S19 |
| 7. Electrochemical Characterization.....                              | Page S24 |
| 8. UV-Vis Absorption Spectra of Radical Cation and Radical Anion..... | Page S27 |
| 9. Nanosecond Time-Resolved Transient Absorption Spectra.....         | Page S28 |
| 10. DFT Calculations.....                                             | Page S35 |
| 11. Coordinates of the Optimized Geometries of the Compounds.....     | Page S39 |
| 12. Reference.....                                                    | Page S44 |

## 1. Experimental Section

**1.1 General Information.** All the chemicals used in synthesis are analytically pure and were used as received. Solvents were dried prior to use. The molecular structures were fully verified with nuclear magnetic resonance (NMR), and high-resolution mass spectrometry (HRMS). NMR spectra were recorded on the Bruker Avance spectrometers (400 / 500 MHz).  $^1\text{H}$  and  $^{13}\text{C}$  chemical shifts are reported in parts per million (ppm) relative to tetramethylsilane (TMS), with the residual solvent peak used as an internal reference. UV-vis absorption spectra were measured on a Shimadzu UV-2550 UV-vis spectrophotometer (Shimadzu Ltd., Japan). Fluorescence spectra were recorded with FS5 spectrofluorometer (Edinburgh Instrument Ltd., U.K.). The fluorescence lifetimes were recorded on a OB920 luminescence lifetime spectrometer (Edinburgh Instrument Ltd., U.K.) equipped with 340 nm EPL picosecond pulsed laser for excitation, and the decay of the fluorescence were monitored with the time-correlated single photon counting (TCSPC) technique. The absolute fluorescence quantum yields were measured with a C13534 UV-NIR absolute photoluminescence quantum yield spectrometer, equipped with an optical integration sphere (Hamamatsu Photonics Ltd., Japan).

**1.2 Cyclic Voltammetry.** Cyclic voltammetry curves were recorded by a CHI610D electrochemical workstation (CHI instruments, Inc., Shanghai, China) at scan rate of  $100\text{ mV s}^{-1}$ . Electrochemical measurements were performed at room temperature (RT) using 0.1 M tetrabutylammonium hexafluorophosphate ( $\text{Bu}_4\text{N}[\text{PF}_6]$ ) as supporting electrolyte, a glassy carbon electrode as working electrode, and platinum electrode as counter electrode. The reference electrode was  $\text{Ag}/\text{AgNO}_3$  (0.1 M in acetonitrile), and dichloromethane was used as the solvent. Ferrocene was added as the internal references. The measurement was performed under  $\text{N}_2$  atmosphere.

**1.3 Nanosecond Transient Absorption Spectroscopy.** The nanosecond transient absorption (ns-TA) spectra were studied on LP920 laser flash-photolysis spectrometer (Edinburgh Instruments Ltd, U.K.), and the signal was digitized with a Tektronix TDS 3012B

oscilloscope. The data (kinetic decay traces and spectra) were analyzed with the L900 software. All samples for the measurements were deaerated with N<sub>2</sub> for about 15 min before measurement, and the samples was sealed during the measurement.

**1.4 Density Functional Theory Calculations.** The geometries of the dyads were optimized using density functional theory (DFT) with CAM-B3LYP functional and 6-31G (d) basis set. There are no imaginary frequencies for all optimized structures. The excitation energy and the energy gaps between ground state (S<sub>0</sub>) and the triplet excited states (T<sub>n</sub>) of the compounds were approximated at time-dependent density functional theory (TDDFT) tuned-CAM-B3LYP/6-31G (d) level with PCM model (solvent, cyclohexane and acetonitrile). The optimal  $\omega$  value for the compounds was performed with optDFTw program v1.0<sup>1</sup> (the default range-separation parameter  $\omega$  of 0.33 bohr<sup>-1</sup>), the geometry of the compounds was re-optimized using the optimal  $\omega$  value.<sup>2</sup> All these calculations were performed with Gaussian 16 Rev B01 program package.<sup>3</sup>

## 2. Synthesis of the Compounds

### Scheme S1. Synthesis of the Compounds <sup>a</sup>

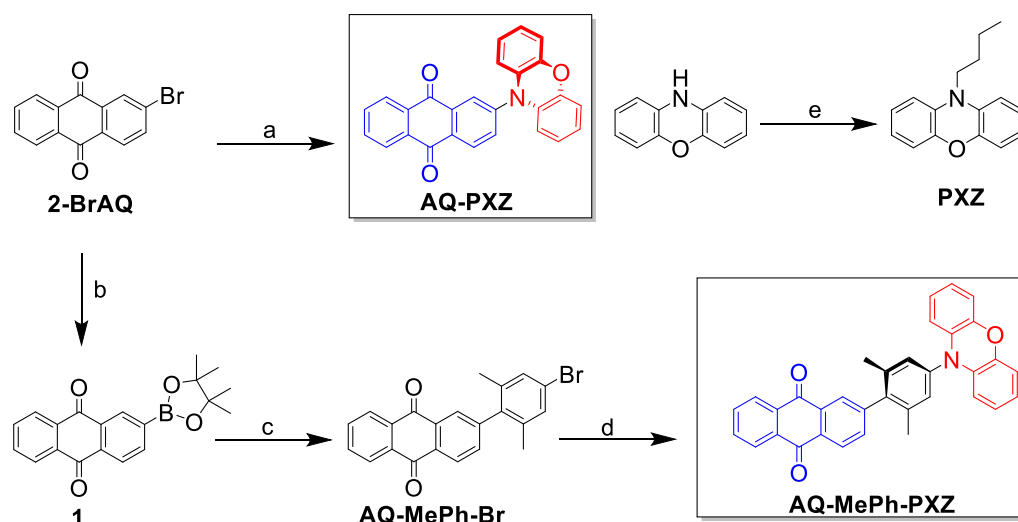

<sup>a</sup>Key: (a) Phenoxazine, Pd<sub>2</sub>(dba)<sub>3</sub>, tri-*tert*-butylphosphine, *t*-BuONa, dry toluene, N<sub>2</sub>, stirred at reflux 24 h, yield: 77%; (b) Bis(pinacolate)diboron, PdCl<sub>2</sub>(dppf)•CH<sub>2</sub>Cl<sub>2</sub>, KOAc, dry 1,4-dioxane, stirred at reflux 24 h, yield: 68%; (c) 5-Bromo-2-iodo-1,3-dimethylbenzene, K<sub>2</sub>CO<sub>3</sub>, Pd(PPh<sub>3</sub>)<sub>4</sub>, toluene/ethanol/water = 4/2/1 (v/v/v), stirred at reflux 8 h, yield: 64%; (d) similar to step (a), yield: 84%; (e) *n*-C<sub>4</sub>H<sub>9</sub>Br, dry dimethylformamide, KOH, N<sub>2</sub>, stirred at RT for 12 h, yield: 70%.

**2.1 Synthesis of PXZ.** The synthesis of **PXZ** was referred to the literature.<sup>4</sup> The crude product was purified by column chromatography (silica gel, PE/DCM = 10/1, v/v) to give **PXZ** as colorless oil (300 mg, yield: 77%). <sup>1</sup>H NMR (400 MHz, CDCl<sub>3</sub>): δ = 6.79–6.45 (m, 8H), 3.46 (s, 2H), 1.67–1.59 (m, 2H), 1.47–1.38 (m, 2H), 1.04–0.98 (t, 3H, *J* = 7.3 Hz). HRMS (APCI, *m/z*) calcd for C<sub>16</sub>H<sub>18</sub>NO [M+H]<sup>+</sup>, 240.1388, found 240.1369.

**2.2 Synthesis of Compound 1.** 2-Bromoanthraquinone (1.0 g, 3.5 mmol), bis(pinacolate)diboron (1.1 g, 4.2 mmol) and KOAc (1.0 g, 10 mmol) were added to dry 1,4-dioxane (30 mL). The suspension was bubbled with nitrogen for 30 min and PdCl<sub>2</sub>(dppf)•CH<sub>2</sub>Cl<sub>2</sub> (dppf = 1,1'-bis(diphenylphosphino)ferrocene) (140 mg, 0.2 mmol) was added. Kept in darkness, the reaction mixture was stirred at 80 °C for 12 h under nitrogen atmosphere. After completion of the reaction, the reaction mixture was cooled to RT. Then

saturated aqueous NH<sub>4</sub>Cl solution (30 mL) was added and the mixture was extracted with ethyl acetate. The organic layer was dried by anhydrous Na<sub>2</sub>SO<sub>4</sub> and the solvent was evaporated under reduced pressure. The crude product was purified by column chromatography (silica gel, PE/DCM = 2/1, v/v) to obtain a yellow solid (795 mg, yield: 68%). <sup>1</sup>H NMR (CDCl<sub>3</sub>, 400 MHz) δ = 8.76 (s, 1 H), 8.35–8.30 (m, 3 H), 8.21 (d, 1 H, *J* = 7.7 Hz), 7.82–7.80 (m, 2 H), 1.39 (s, 12 H). HRMS (APCI, *m/z*) calcd for C<sub>20</sub>H<sub>20</sub>BO<sub>4</sub><sup>+</sup> [M+H]<sup>+</sup>, 335.1454, found 335.1434.

**2.3 Synthesis of AQ-MePh-Br. Compound 1** (334 mg, 1.0 mmol), 5-bromo-2-iodo-1,3-dimethylbenzene (372 mg, 1.2 mmol) and potassium carbonate (414 mg, 3.0 mmol) were dissolved in toluene/ethanol/water (4/2/1, v/v/v) in a 25 ml double neck flask. The suspension was bubbled with nitrogen for 30 min and Pd(PPh<sub>3</sub>)<sub>4</sub> (85 mg, 0.08 mmol) was added. Kept in darkness, the reaction mixture was refluxed at 90 °C for 8 h under nitrogen atmosphere. After completed reaction, the mixture was extracted with dichloromethane (3 × 20 mL), and dried over anhydrous Na<sub>2</sub>SO<sub>4</sub>, and the solvent was evaporated under reduced pressure. The crude product was purified by column chromatography (silica gel, PE/DCM = 2/1, v/v) to give a purple solid (250 mg, yield: 64%). M.p.: 222.5–223.6 °C. <sup>1</sup>H NMR (400 MHz, CDCl<sub>3</sub>): δ = 8.40 (d, 1 H, *J* = 7.9 Hz), 8.37–8.32 (m, 2 H), 8.10 (s, 1 H), 7.84–7.82 (m, 2 H), 7.57 (d, 1 H, *J* = 7.9 Hz), 7.31 (s, 2 H), 2.02 (s, 6 H). <sup>13</sup>C NMR (126 MHz, CDCl<sub>3</sub>): δ = 183.12, 182.90, 146.65, 138.82, 137.69, 134.96, 134.24, 134.18, 133.86, 133.63, 132.45, 130.47, 127.83, 127.30, 121.73, 20.60. HRMS (APCI, *m/z*) calcd for C<sub>22</sub>H<sub>16</sub>BrO<sub>2</sub><sup>+</sup> [M+H]<sup>+</sup>, 391.0333, found 391.0308.

**2.4 Synthesis of AQ-PXZ.** Under N<sub>2</sub> atmosphere, phenoxazine (275 mg, 1.5 mmol), 2-bromoanthraquinone (287 mg, 1.0 mmol), Pd<sub>2</sub>(dba)<sub>3</sub> (3% mol, 27 mg), tri-*tert*-butylphosphine (6% mol, 12 mg) and sodium *tert*-butoxide (3 eq., 288 mg) were mixed in dry toluene (5 mL). The mixture was refluxed for 10 h at 120 °C. After the reaction, the mixture was extracted with dichloromethane (3 × 20 mL), and dried over anhydrous Na<sub>2</sub>SO<sub>4</sub>, and the solvent was evaporated under reduced pressure. The crude product was purified by column chromatography (silica gel, PE/DCM = 2/1, v/v) to give a purple solid (300 mg, yield: 77%). M.p.: > 250 °C. <sup>1</sup>H NMR (400 MHz, CDCl<sub>3</sub>): δ = 8.53 (d, 1H, *J* = 8.2 Hz), 8.36–8.34 (m, 3H), 7.86–

7.80 (m, 3H), 6.79–6.71 (m, 4H), 6.65–6.62 (m, 2H), 6.05 (dd, 2H,  $J = 8.0, 1.4$  Hz).  $^{13}\text{C}$  NMR (126 MHz,  $\text{CDCl}_3$ ):  $\delta = 182.23, 145.41, 144.44, 136.30, 136.18, 134.45, 134.35, 133.52, 133.49, 133.21, 132.73, 130.43, 129.24, 127.46, 127.42, 123.39, 122.47$ . HRMS (ESI,  $m/z$ ) calcd for  $\text{C}_{26}\text{H}_{16}\text{NO}_3^+$   $[\text{M}+\text{H}]^+$ , 390.1130, found 390.1114.

**2.5 Synthesis of AQ-MePh-PXZ.** The synthesis of **AQ-MePh-PXZ** was similar to **AQ-PXZ**. The crude product was purified by column chromatography (silica gel, PE/DCM = 2/1, v/v) to give a purple solid (108 mg, yield: 84%). M.p.: > 250 °C.  $^1\text{H}$  NMR (400 MHz,  $\text{CDCl}_3$ ):  $\delta = 8.45$  (d, 1 H,  $J = 7.9$  Hz), 8.38–8.35 (m, 2 H), 8.20 (d, 1 H,  $J = 7.9$  Hz), 7.84–7.82 (m, 2 H), 7.70 (d, 1 H,  $J = 7.9$  Hz), 7.13 (s, 2 H), 6.71–6.63 (m, 5 H), 6.05 (s, 2 H), 2.09 (s, 6 H).  $^{13}\text{C}$  NMR (126 MHz,  $\text{CDCl}_3$ ):  $\delta = 183.18, 182.93, 146.97, 144.01, 140.11, 138.70, 138.49, 135.02, 134.41, 134.27, 134.18, 133.90, 133.67, 133.65, 132.47, 129.55, 127.97, 127.86, 127.33, 127.32, 123.26, 121.30, 115.43, 113.40, 20.91$ . HRMS (APCI,  $m/z$ ) calcd for  $\text{C}_{34}\text{H}_{24}\text{NO}_3^+$   $[\text{M}+\text{H}]^+$ , 494.1756, found 494.1731.

### 3. Molecular Structure Characterization Data

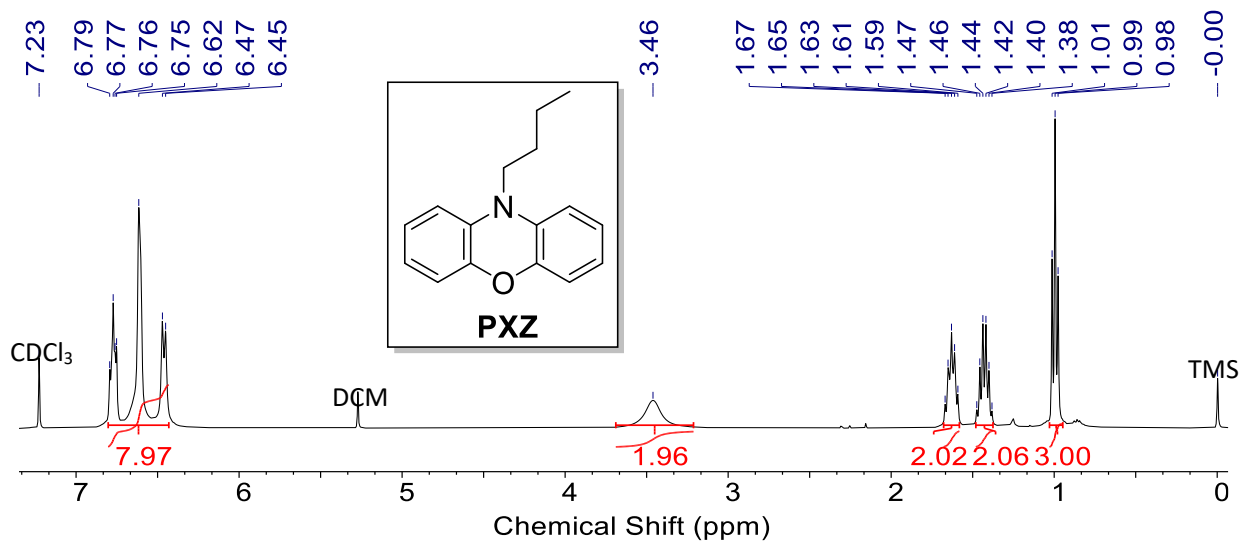

**Fig. S1** <sup>1</sup>H NMR spectrum of **PXZ** (400 MHz, CDCl<sub>3</sub>).

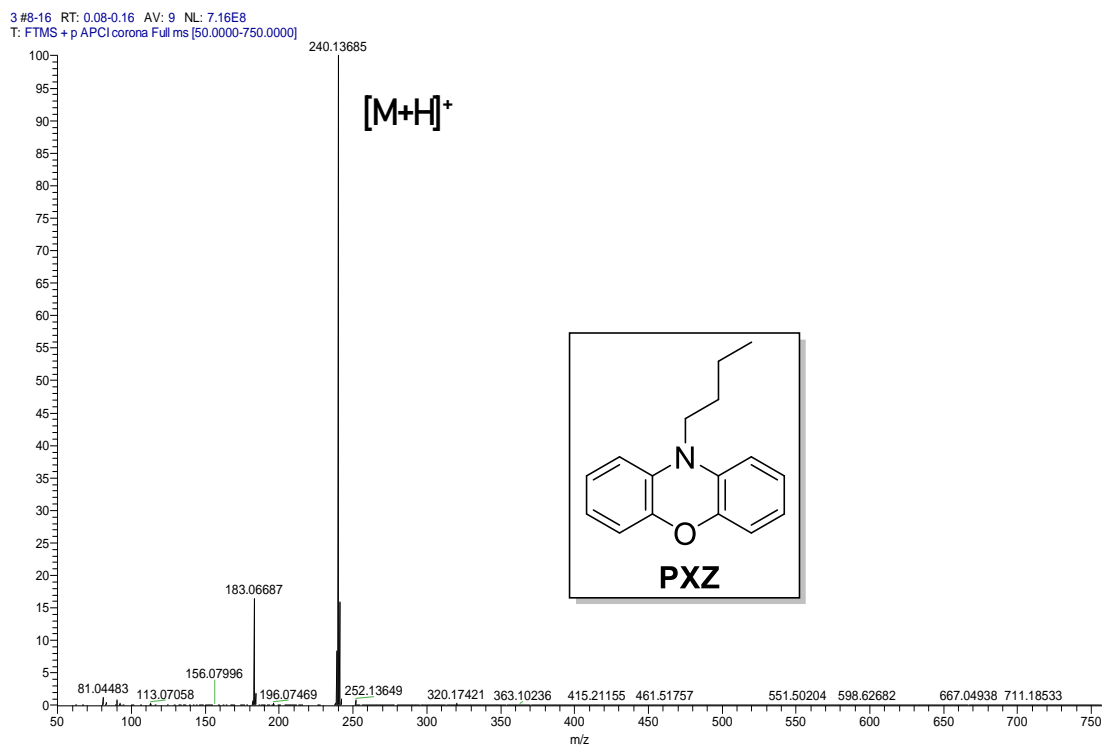

**Fig. S2** APCI high resolution mass spectrum of **PXZ**.



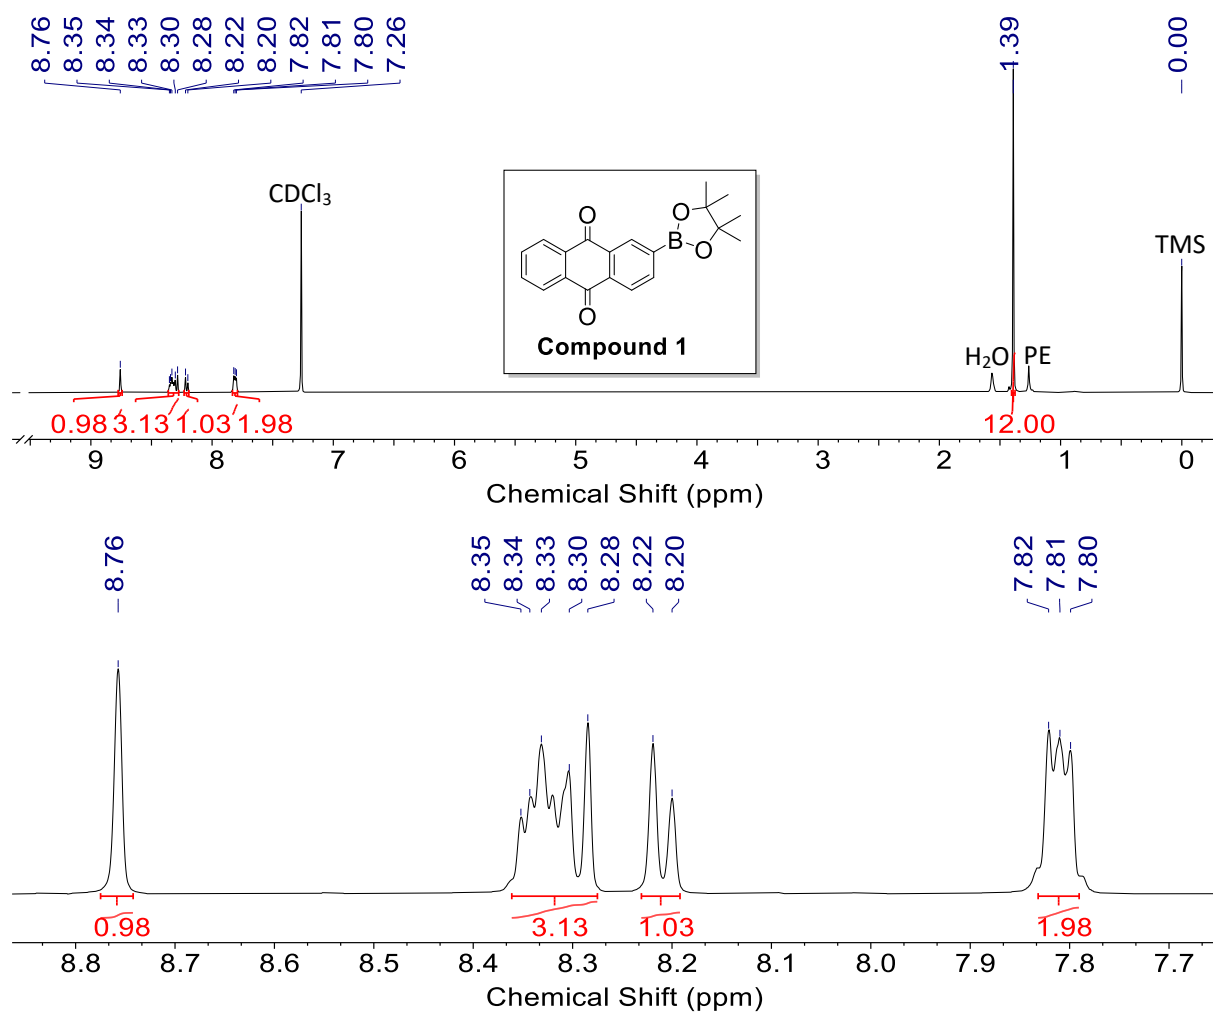

**Fig. S3**  $^1\text{H}$  NMR spectrum of Compound **1** (400 MHz,  $\text{CDCl}_3$ ).

1 #8-23 RT: 0.08-0.24 AV: 16 NL: 1.78E8  
T: FTMS + p APCI corona Full ms [50.0000-750.0000]

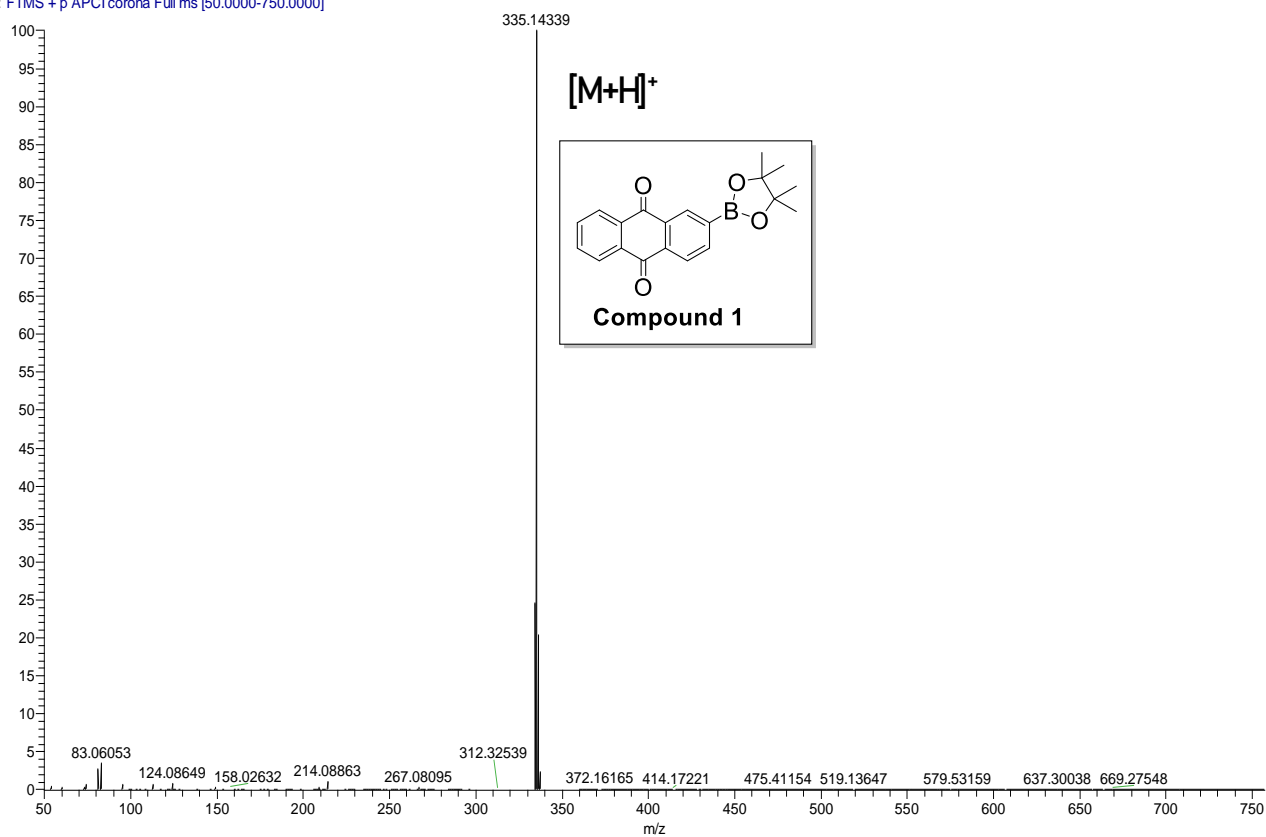

**Fig. S4** APCI high resolution mass spectrum of Compound **1**.

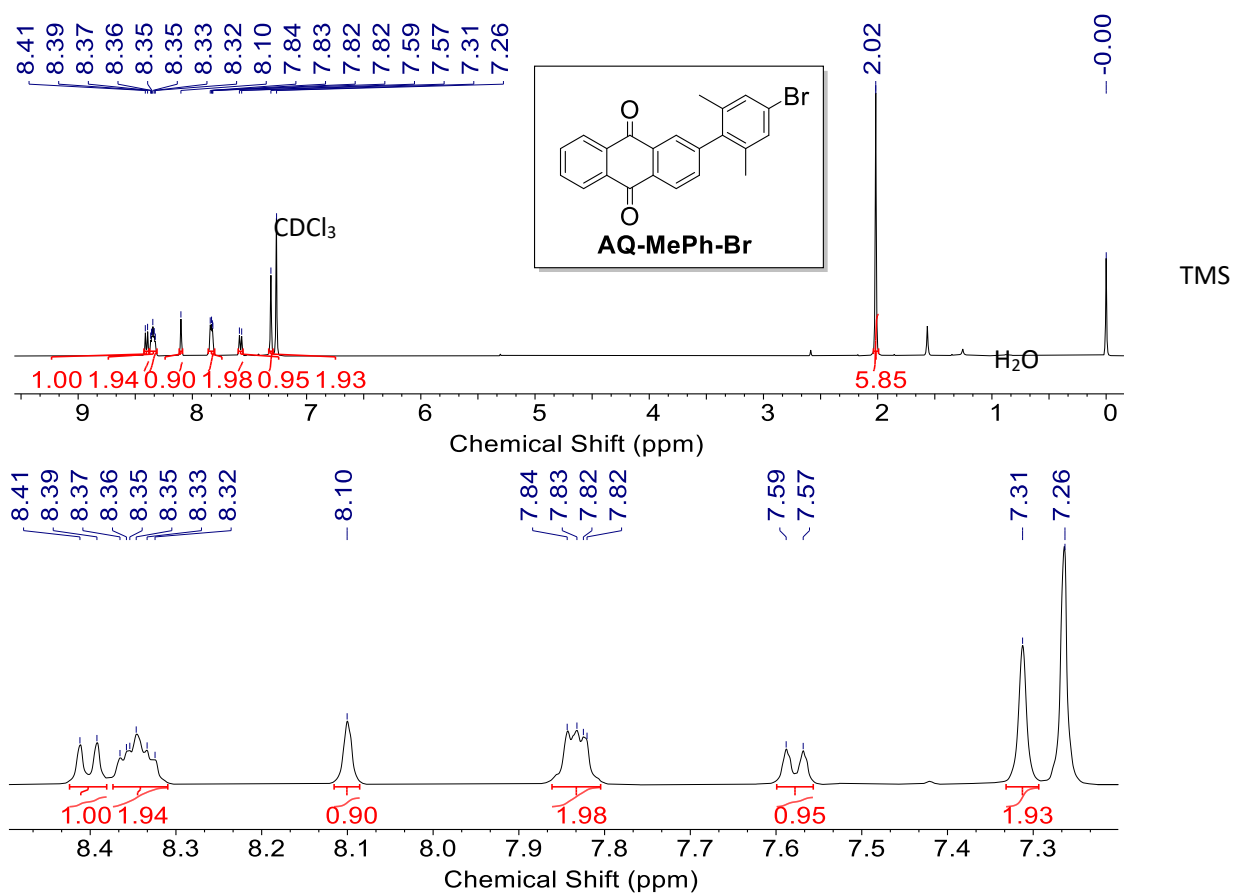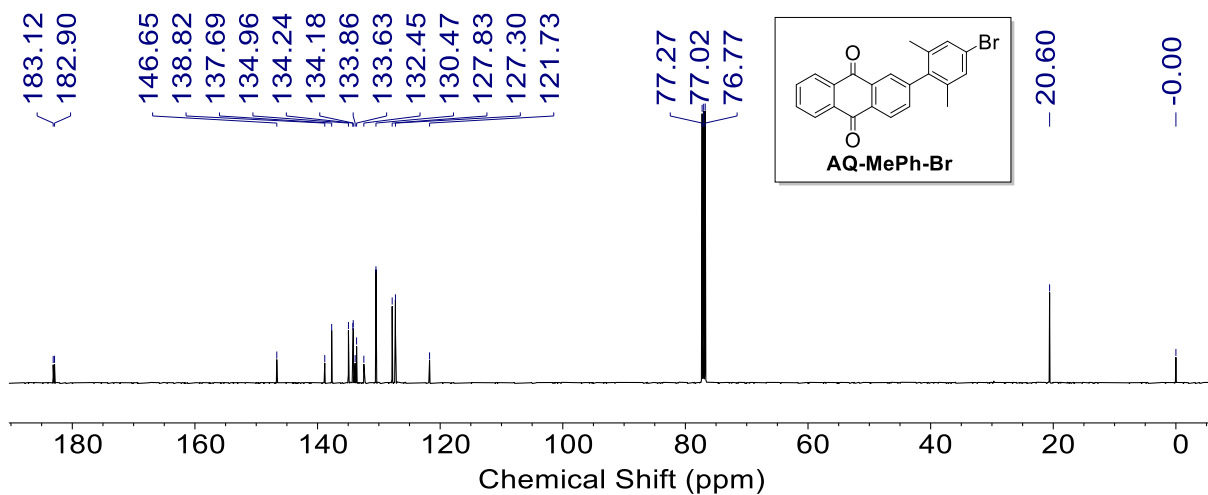

2 #7-21 RT: 0.08-0.24 AV: 15 NL: 5.09E6  
T: FTMS + p APCI corona Full ms [50.0000-750.0000]

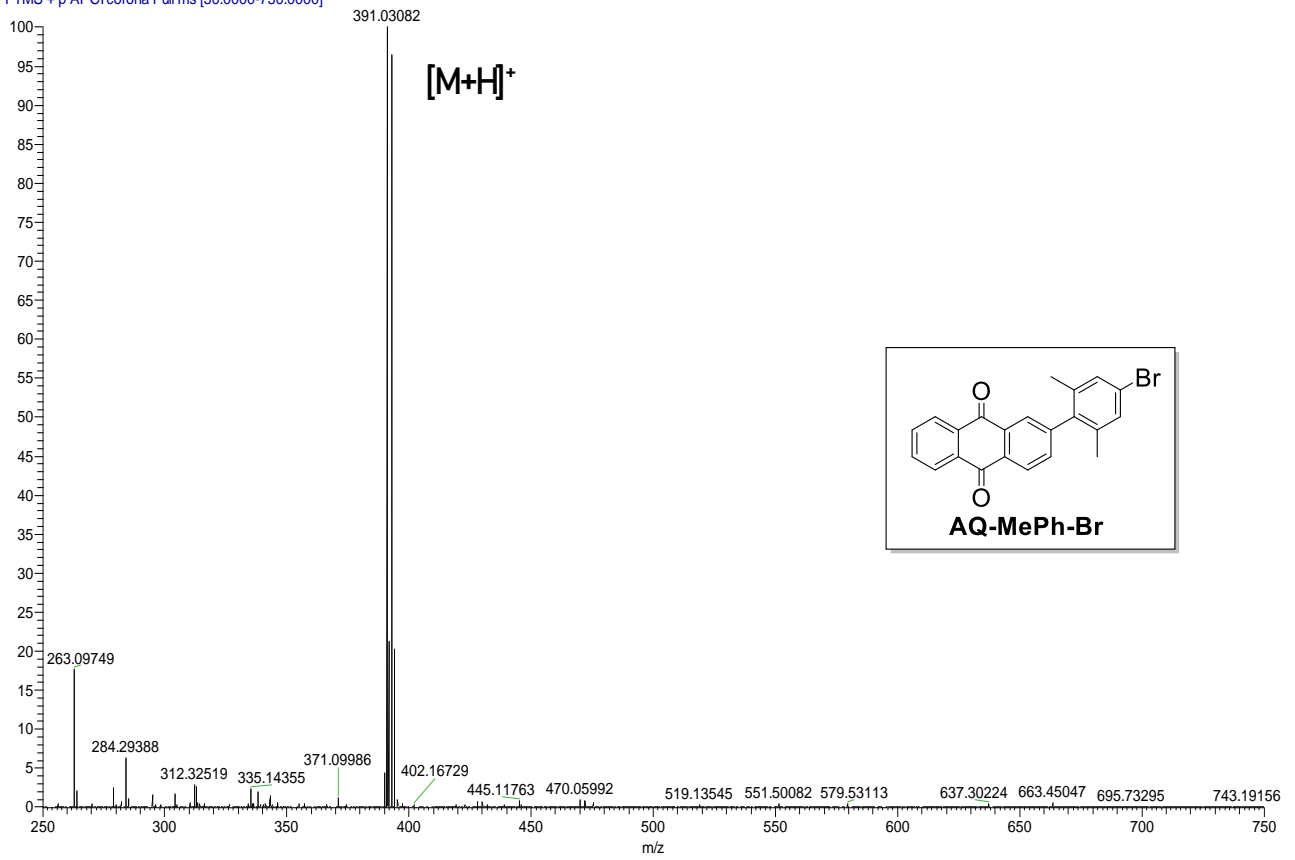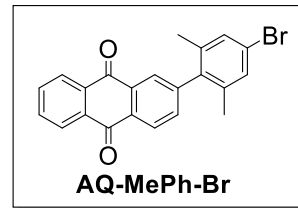

**Fig. S7** APCI high resolution mass spectrum of **AQ-MePh-Br**.

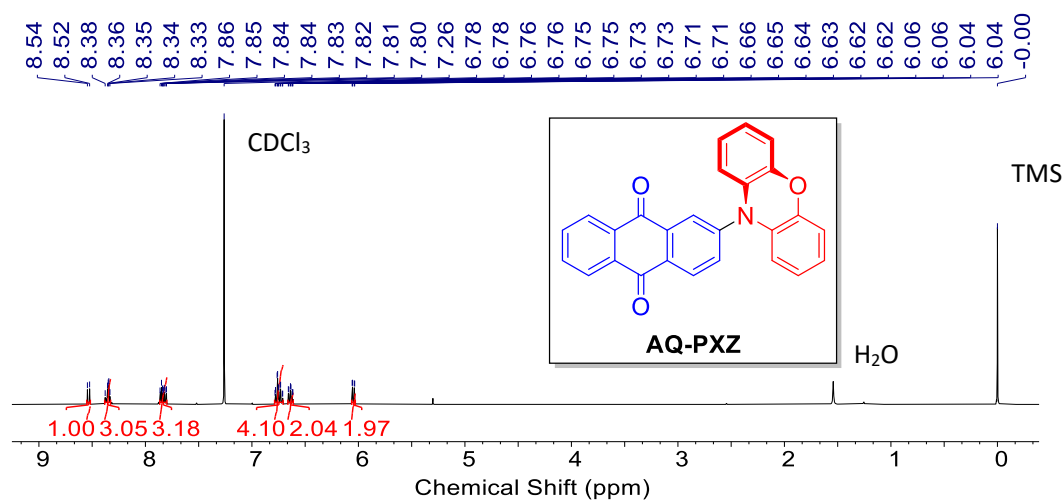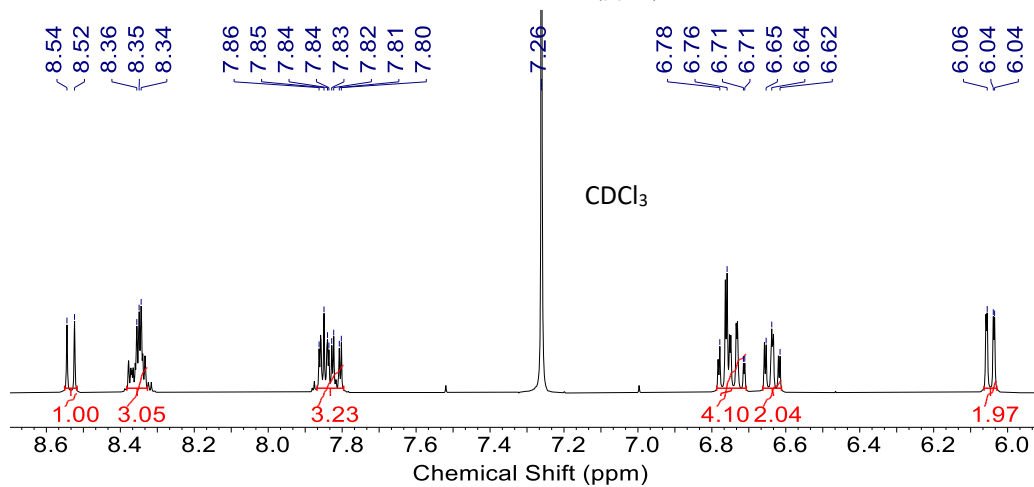

**Fig. S8** <sup>1</sup>H NMR spectrum of **AQ-PXZ** (400 MHz, CDCl<sub>3</sub>).

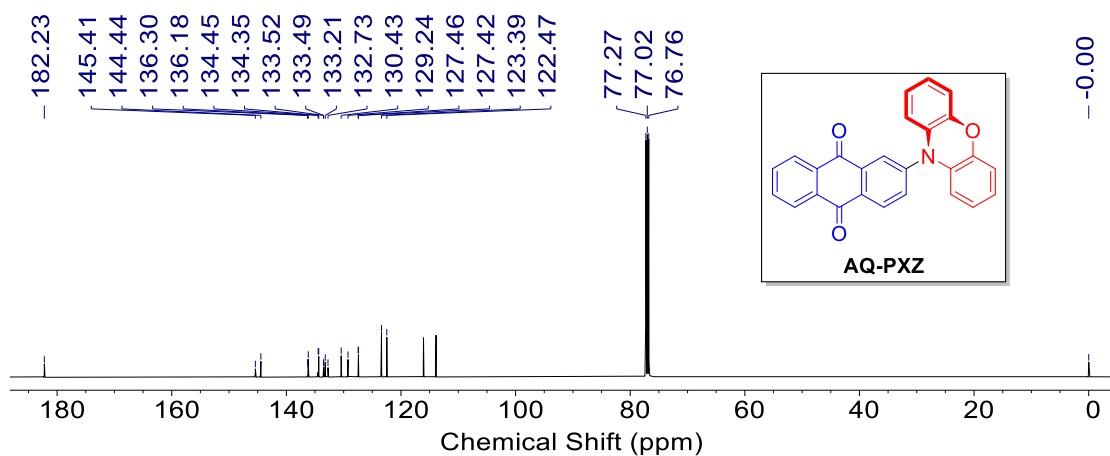

**Fig. S9** <sup>13</sup>C NMR spectrum of **AQ-PXZ** (126 MHz, CDCl<sub>3</sub>).

20210304-zxy-m389- #18-20 RT: 0.16-0.18 AV: 3 SB: 2 0.02-0.03 NL: 4.40E5  
T: FIMS + p ESI Full ms [120.00-800.00]

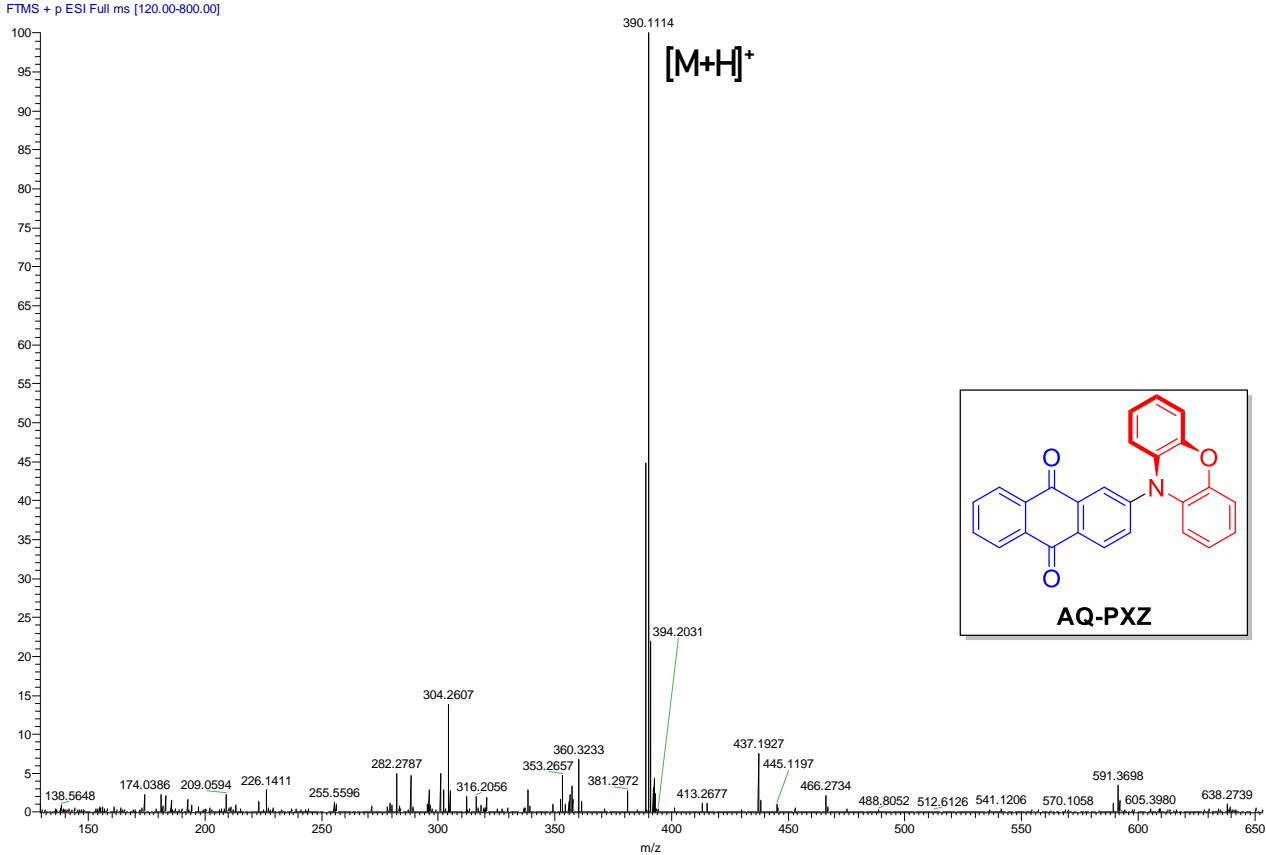

**Fig. S10** ESI high resolution mass spectrum of **AQ-PXZ**.

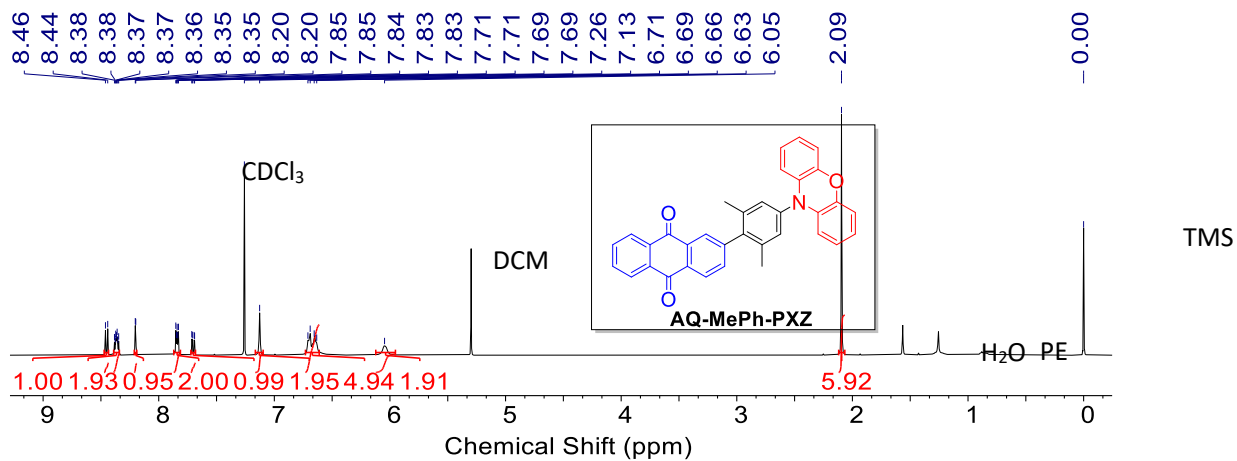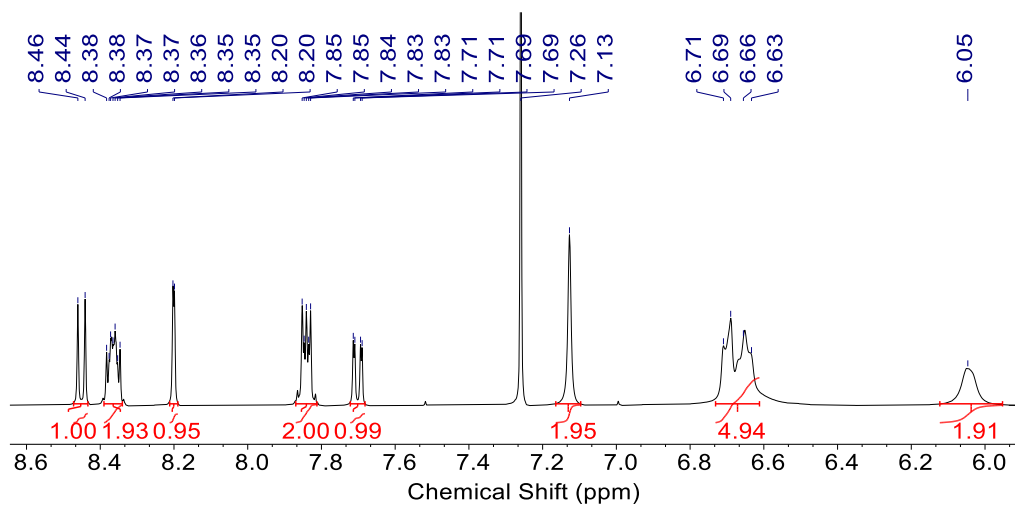

**Fig. S11** <sup>1</sup>H NMR spectrum of **AQ-MePh-PXZ** (400 MHz, CDCl<sub>3</sub>).

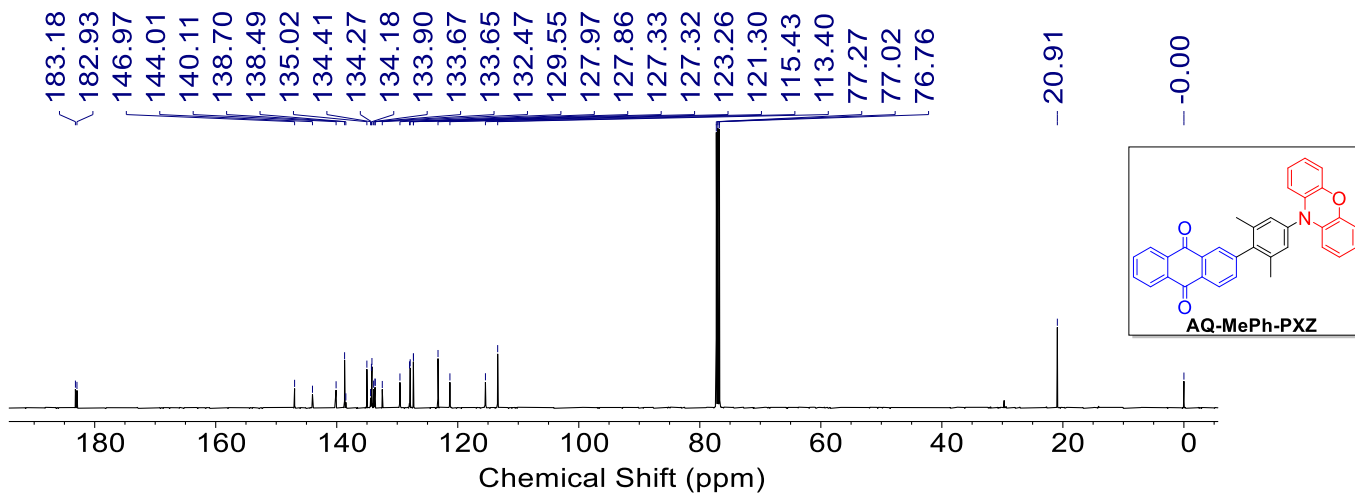

**Fig. S12** <sup>13</sup>C NMR spectrum of **AQ-MePh-PXZ** (126 MHz, CDCl<sub>3</sub>).

4 #8-16 RT: 0.08-0.16 AV: 9 NL: 2.10E8  
T: FTMS + p APCI corona Full ms [50.0000-750.0000]

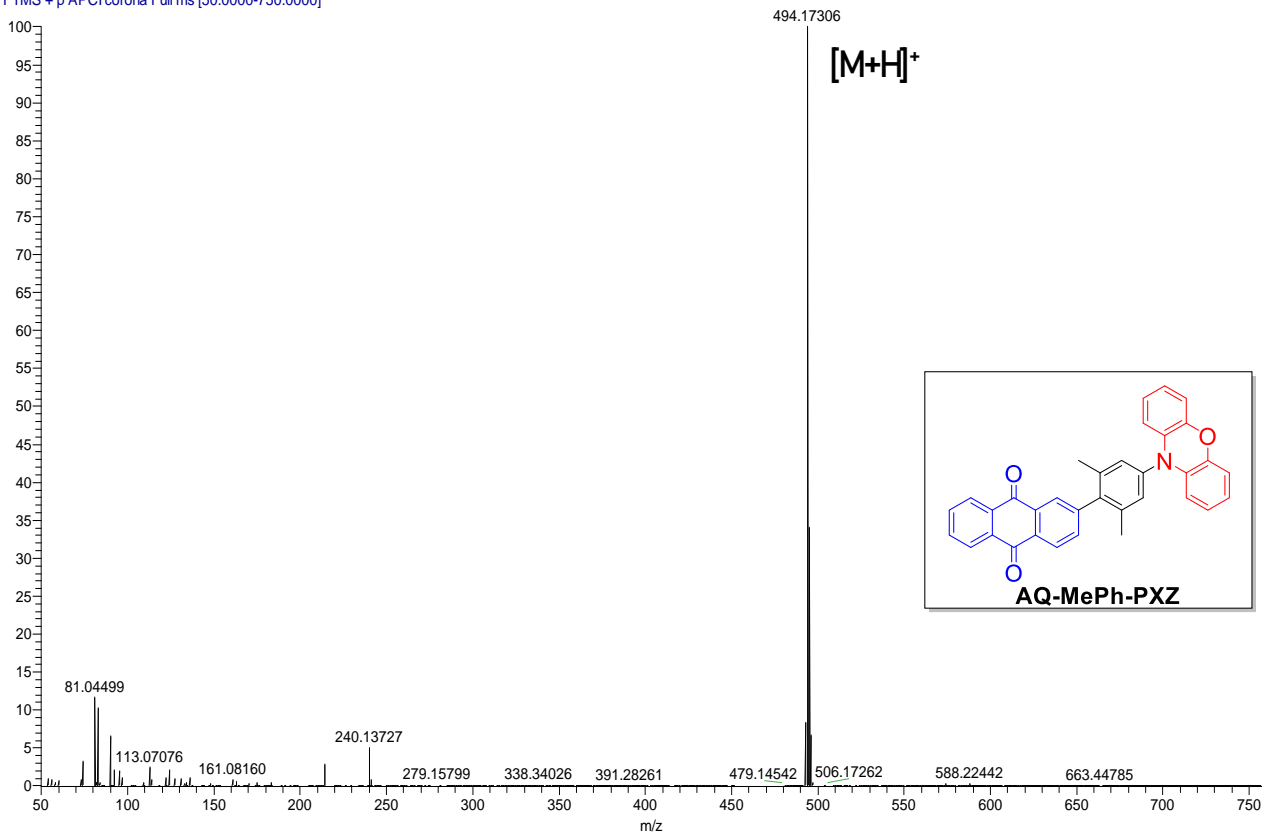

**Fig. S13** APCI high resolution mass spectrum of **AQ-MePh-PXZ**.



## 4. Crystallographic Data

**Table S1. Crystal Data for AQ-MePh-PXZ.**

| Compounds                                         | <b>AQ-MePh-PXZ·CH<sub>2</sub>Cl<sub>2</sub></b>                 |
|---------------------------------------------------|-----------------------------------------------------------------|
| Sum formula                                       | C <sub>35</sub> H <sub>25</sub> Cl <sub>2</sub> NO <sub>3</sub> |
| Formula weight                                    | 578.460                                                         |
| Temperature (K)                                   | 120                                                             |
| Wavelength (Å)                                    | 0.71073                                                         |
| Crystal system                                    | Triclinic                                                       |
| Space group                                       | P/ $\bar{1}$                                                    |
| a (Å)                                             | 8.3400(8)                                                       |
| b (Å)                                             | 12.8996(14)                                                     |
| c (Å)                                             | 14.2181(15)                                                     |
| $\alpha$ (deg)                                    | 73.215(3)                                                       |
| $\beta$ (deg)                                     | 73.872(3)                                                       |
| $\gamma$ (deg)                                    | 85.302(3)                                                       |
| Volume (Å <sup>3</sup> )                          | 1406.8(3)                                                       |
| Z                                                 | 2                                                               |
| D <sub>x</sub> / g·cm <sup>-3</sup>               | 1.366                                                           |
| crystal size (mm)                                 | 0.30×0.2×0.11                                                   |
| F (000)                                           | 600.0                                                           |
| $\mu$ / mm <sup>-1</sup>                          | 0.269                                                           |
| Theta range /deg                                  | 2.560– 24.942                                                   |
| <i>R</i>                                          | 0.0593                                                          |
| $\omega R_2$                                      | 0.1650                                                          |
| <i>T</i> <sub>min</sub> / <i>T</i> <sub>max</sub> | 0.708 / 0.745                                                   |

## 5. Steady State UV-Vis Absorption Spectra

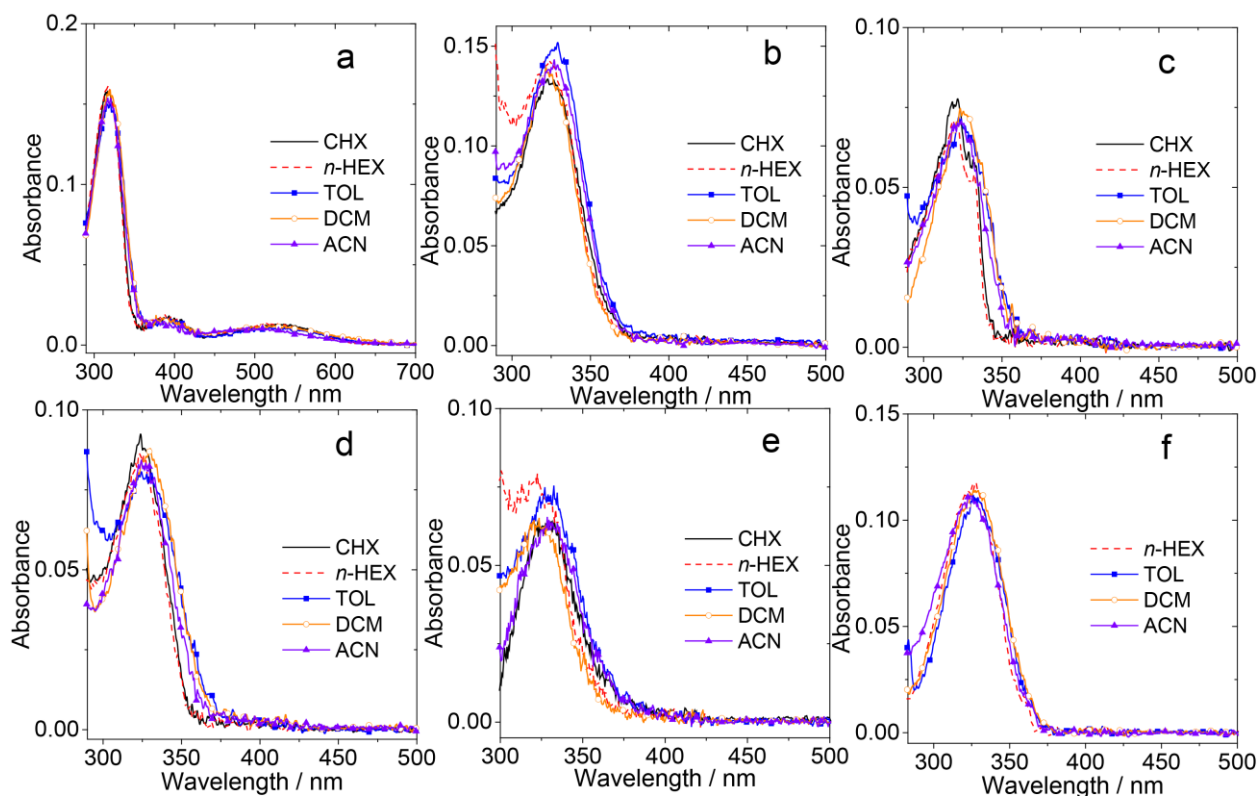

**Fig. S14** UV-vis absorption spectra of (a) **AQ-PXZ**, (b) **AQ-MePh-PXZ**, (c) **AQ**, (d) **2-BrAQ**, (e) **AQ-MePh-Br** and (f) **PXZ** in different solvents.  $c = 1.0 \times 10^{-5}$  M, 20 °C.

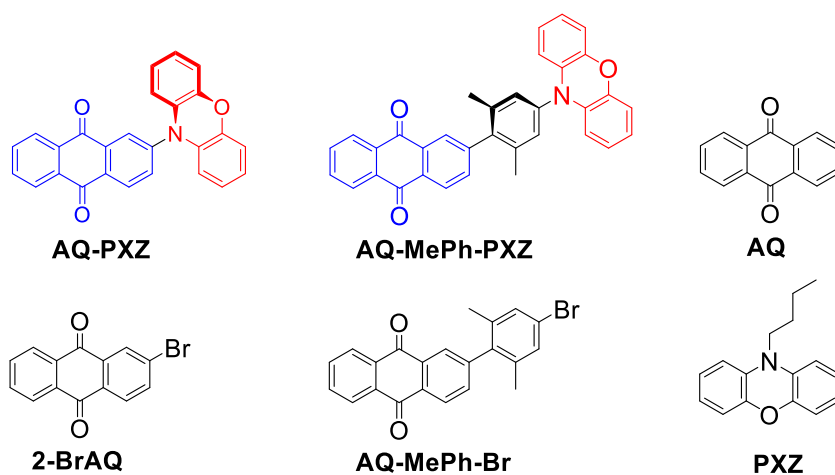

## 6. Fluorescence Spectra and Fluorescence Lifetime

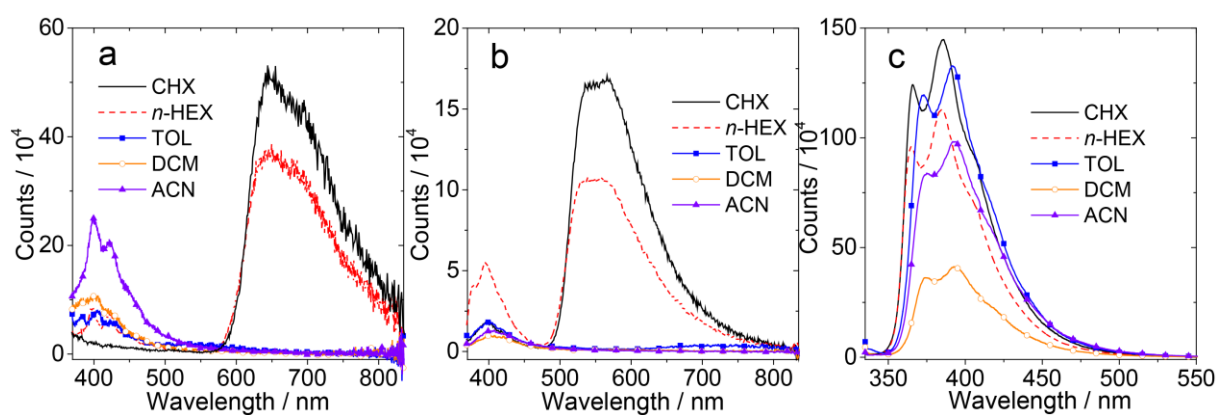

**Fig. S15** Fluorescence emission spectra of (a) **AQ-PXZ**, (b) **AQ-MePh-PXZ** and (c) **PXZ** in different solvents. Optically matched solutions were used ( $\lambda_{\text{ex}} = 325 \text{ nm}$ ,  $A = 0.037$ ),  $20 \text{ }^\circ\text{C}$ .

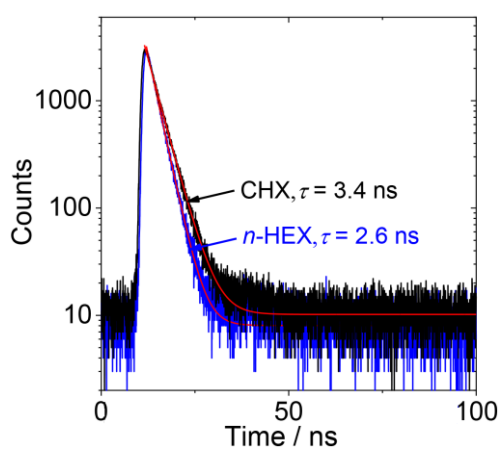

**Fig. S16** Emission decay traces of **PXZ** monitor at 380 nm in different solvent,  $c = 1.0 \times 10^{-5} \text{ M}$ ,  $\lambda_{\text{ex}} = 340 \text{ nm}$ ,  $20 \text{ }^\circ\text{C}$ .

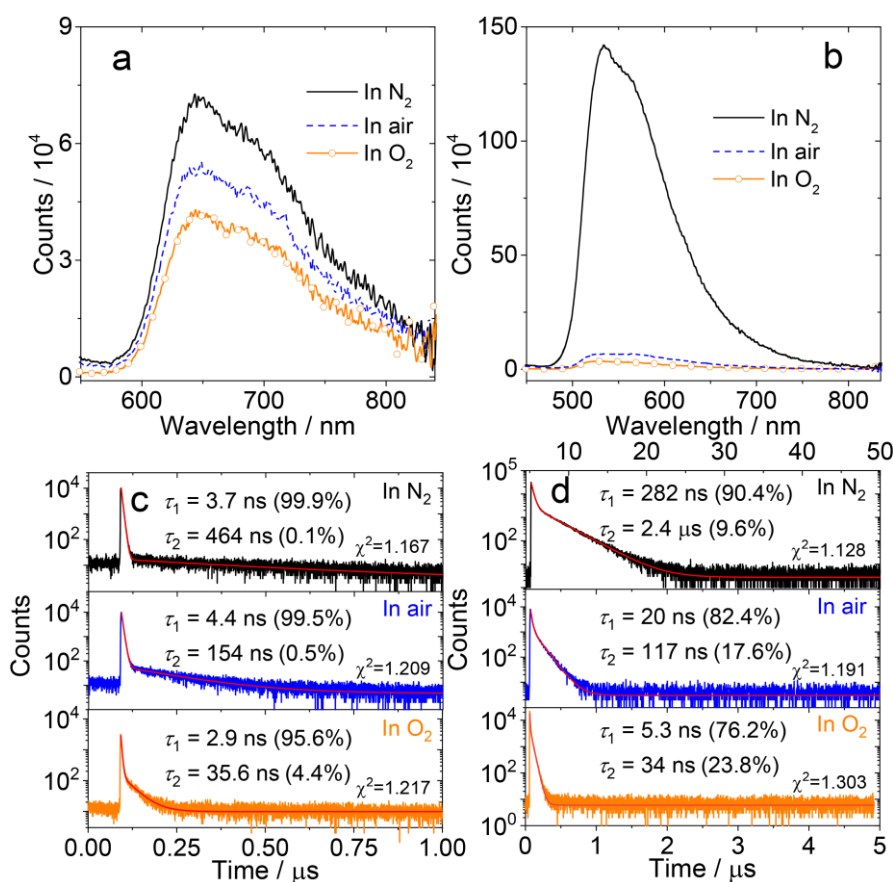

**Fig. S17** Fluorescence emission spectra of (a) **AQ-PXZ** and (b) **AQ-MePh-PXZ** in different atmosphere. Optically matched solutions were used ( $\lambda_{ex} = 325$  nm,  $A = 0.037$ ). Decay traces in different atmosphere of (c) **AQ-PXZ** at 640 nm,  $c = 5.0 \times 10^{-5}$  M and (d) **AQ-MePh-PXZ** at 550 nm,  $c = 3.0 \times 10^{-5}$  M.  $\lambda_{ex} = 340$  nm, 20 °C. The Reduced Chi-Square ( $\chi^2$ ) were presented to illustrate the quality of the fitting.

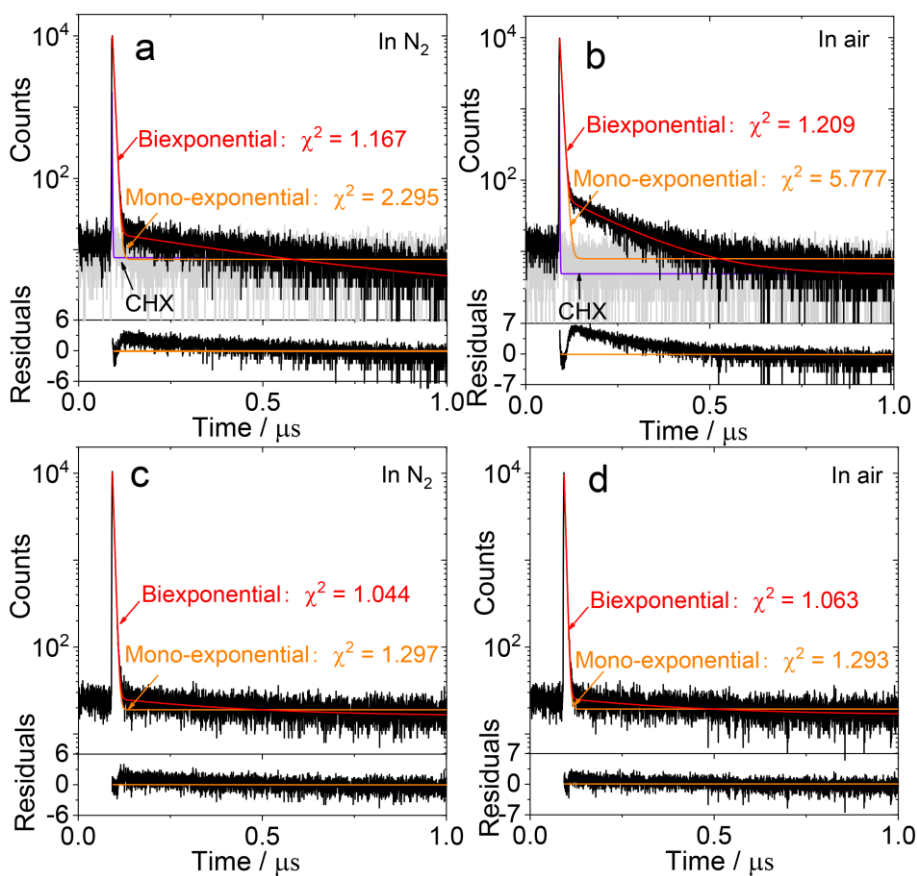

**Fig. S18** Comparison of mono- and biexponential fitting the decay trace of **AQ-PXZ** (a) in  $\text{N}_2$ , (b) in air and **BDP-AN** (c) in  $\text{N}_2$ , (d) in air,  $c = 3.0 \times 10^{-5}$  M.  $\lambda_{\text{ex}} = 340$  nm,  $20^\circ\text{C}$ . **BDP-AN** was act as a reference compound, which is a free-TADF compound.<sup>6</sup> For **AQ-PXZ**, the biexponential fitting is more reasonable due to its two emission components. The Reduced Chi-Square ( $\chi^2$ ) were presented to illustrate the goodness of fit.

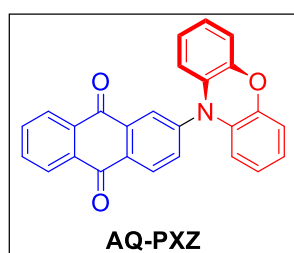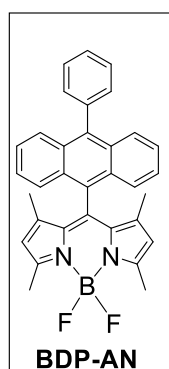

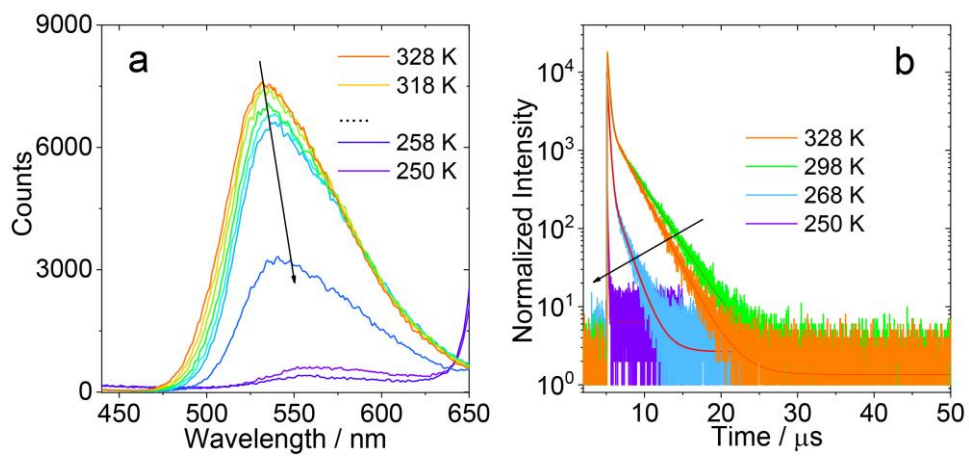

**Fig. S19** (a) Temperature-dependent fluorescence emission spectra of **AQ-MePh-PXZ** in deaerated CHX,  $c = 3.0 \times 10^{-5}$  M. (b) Temperature-dependent emission decay traces of **AQ-MePh-PXZ** in deaerated CHX,  $\lambda_{\text{ex}} = 340$  nm.

**Table S2. Temperature Dependent Emission Decay Traces Data of AQ-MePh-PXZ in Solution <sup>a</sup>**

| <i>T</i> / K | $\tau_1^b$ / ns | Ratio <sup>c</sup> / % | $\tau_2^d$ / ns | Ratio <sup>e</sup> / % |
|--------------|-----------------|------------------------|-----------------|------------------------|
| 328          | 232             | 87.55                  | 2301            | 12.45                  |
| 298          | 271             | 89.96                  | 2891            | 10.04                  |
| 268          | 222             | 96.02                  | 1468            | 3.98                   |
| 250          | 2.69            | 91.33                  | – <sup>f</sup>  | – <sup>f</sup>         |
|              | 84.7            | 8.67                   |                 |                        |

<sup>a</sup>In deaerated CHX,  $c = 3.0 \times 10^{-5}$  M,  $\lambda_{ex} = 340$  nm. <sup>b</sup>Lifetime of the prompt fluorescence. <sup>c</sup>Ratio of the prompt fluorescence. <sup>d</sup>Lifetime of the delayed fluorescence. <sup>e</sup>Ratio of the delayed fluorescence. <sup>f</sup>Not observed.

**Scheme S2. Putative Mechanism for Rationalization of the Temperature-Dependent TADF Property and the rISC Mechanism for AQ-MePh-PXZ<sup>a</sup>**

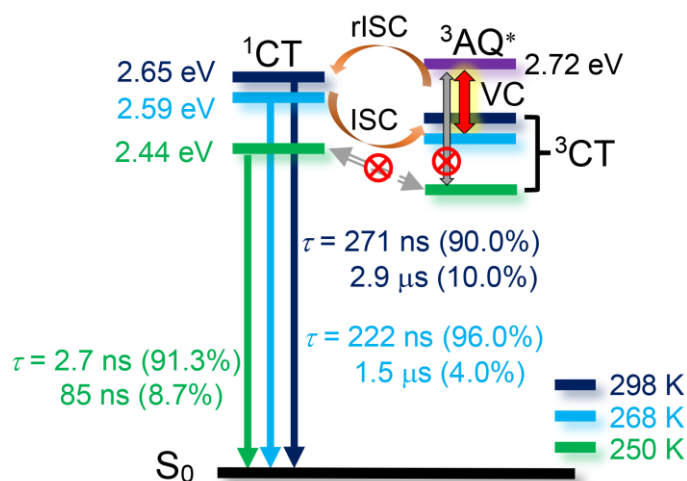

<sup>a</sup>VC: vibronic coupling. The energy levels of the  $^1CT$  states are approximated from the onset of CT emission at the corresponding temperature. The energy level of  $^3AQ^*$  state is obtained from reported result.<sup>5</sup> The energy levels of the  $^3CT$  states are estimated similar to  $^1CT$  states.

## 7. Electrochemical Characterization

The Gibbs free energy change ( $\Delta G_{CS}$ ) of the electron-transfer process was calculated using the Rehm-Weller equation (eq. S1–S3):<sup>7,8</sup>

$$\Delta G_{CS} = e[E_{OX} - E_{RED}] - E_{00} + \Delta G_S \quad (\text{eq. S1})$$

$$\Delta G_S = -\frac{e^2}{4\pi\epsilon_s\epsilon_0 R_c} - \frac{e^2}{8\pi\epsilon_0} \left( \frac{1}{R_D} + \frac{1}{R_A} \right) \left( \frac{1}{\epsilon_{REF}} - \frac{1}{\epsilon_S} \right) \quad (\text{eq. S2})$$

$$E_{CS} = e[E_{OX} - E_{RED}] + \Delta G_S \quad (\text{eq. S3})$$

in which  $\Delta G_S$  is the static Coulombic energy, which is described by eq. S2. In eq. S1–S3,  $e$  is the electronic charge,  $E_{OX}$  is the half-wave potential for one-electron oxidation of the electron-donor unit (for irreversible oxidation, the anodic peak potential was used instead of the half-wave potential), and  $E_{RED}$  is the half-wave potential for one-electron reduction of the electron-acceptor unit,  $E_{00}$  is the energy level approximated with an average value between absorption and emission of **AQ** in CHX solution,  $\epsilon_S$  is the static dielectric constant of the solvent,  $R_c$  is the center-to-center separation distance between electron donor and acceptor, determined by DFT optimization of the geometry,  $R_c$  (**AQ-PXZ**) = 6.8 Å,  $R_c$  (**AQ-MePh-PXZ**) = 11 Å.  $R_D$  is the radius of the electron donor,  $R_A$  is the radius of the electron acceptor,  $\epsilon_{REF}$  is the static dielectric constant of the solvent used for the electrochemical studies,  $\epsilon_0$  is permittivity of free space. The solvents used in the calculation of free energy of the electron transfer is TOL ( $\epsilon_S = 2.38$ ), DCM ( $\epsilon_S = 8.93$ ) and ACN ( $\epsilon_S = 37.5$ ).



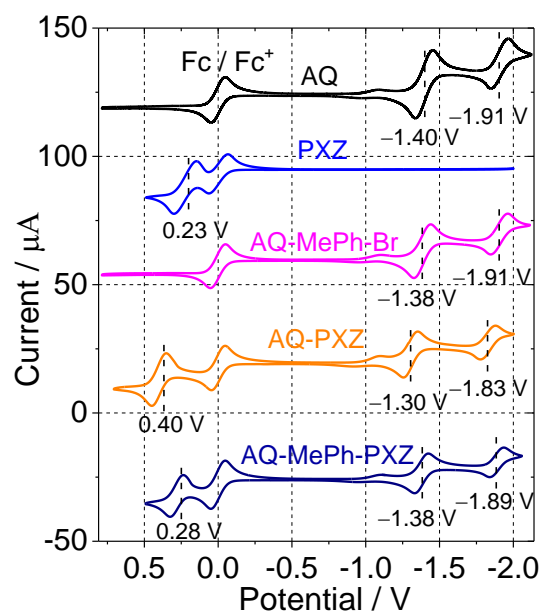

**Fig. S20** Cyclic voltammograms of compounds in deaerated DCM containing 0.10 M tetrabutylammonium hexafluorophosphate ( $\text{Bu}_4\text{N}[\text{PF}_6]$ ) as the supporting electrolyte and  $\text{Ag}/\text{AgNO}_3$  as the reference electrode. Scan rate: 100 mV/s. Ferrocenium/ferrocene ( $\text{Fc}^+/\text{Fc}$ ) redox couple was used as the internal reference,  $c = 1.0 \times 10^{-3}$  M, 20 °C. The oxidation and reduction potential of compounds were presented.

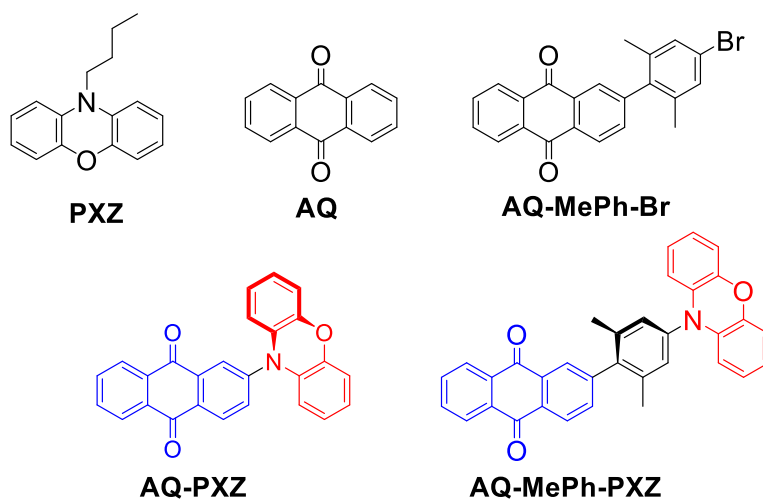

**Table S3. Electrochemical Redox Potentials of the Compounds<sup>a</sup>**

|                    | $E(\text{ox}) / \text{V}$ |                | $E(\text{red}) / \text{V}$ |                |
|--------------------|---------------------------|----------------|----------------------------|----------------|
| <b>PXZ</b>         | +0.23                     | – <sup>b</sup> | – <sup>b</sup>             | – <sup>b</sup> |
| <b>AQ</b>          | – <sup>b</sup>            | –1.40          | –1.91                      |                |
| <b>AQ-MePh-Br</b>  | – <sup>b</sup>            | –1.38          | –1.91                      |                |
| <b>AQ-PXZ</b>      | + 0.40                    | –1.30          | –1.83                      |                |
| <b>AQ-MePh-PXZ</b> | +0.28                     | –1.38          | –1.89                      |                |

<sup>a</sup> Cyclic voltammetry measurements in N<sub>2</sub>-saturated DCM containing a 0.10 M BuN<sub>4</sub>[PF<sub>6</sub>] supporting electrolyte. Redox potentials of the compounds were determined with ferrocenium/ferrocene (Fc<sup>+</sup>/Fc) redox couple as the internal standard (set as 0 V in the cyclic voltammograms). The counter electrode is the Pt electrode, the working electrode is the glassy carbon electrode, and the Ag/AgNO<sub>3</sub> couple is the reference electrode. <sup>b</sup>Not observed.

**Table S4. Gibbs Free Energy of the Charge Separation ( $\Delta G_{\text{CS}}$ ) and Charge Separation Energy Levels ( $E_{\text{CS}}$ ) of the Compounds in Different Solvents**

|                                | $\Delta G_{\text{CS}}$ (eV) |       |       |       | $E_{\text{CS}}$ (eV) |      |      |      |
|--------------------------------|-----------------------------|-------|-------|-------|----------------------|------|------|------|
|                                | <i>n</i> -HEX               | TOL   | DCM   | ACN   | <i>n</i> -HEX        | TOL  | DCM  | ACN  |
| <b>AQ-PXZ<sup>a</sup></b>      | –0.98                       | –1.17 | –1.69 | –1.84 | 2.18                 | 1.99 | 1.47 | 1.32 |
| <b>AQ-MePh-PXZ<sup>b</sup></b> | –0.54                       | –0.83 | –1.65 | –1.87 | 2.62                 | 2.33 | 1.51 | 1.29 |

<sup>a</sup>  $E_{00} = 3.16$  eV. <sup>b</sup>  $E_{00} = 3.16$  eV. The energy levels of  $E_{00}$  are approximated with an average value between absorption and emission of **AQ** in CHX.

## 8. UV-Vis Absorption Spectra of Radical Cation and Radical Anion

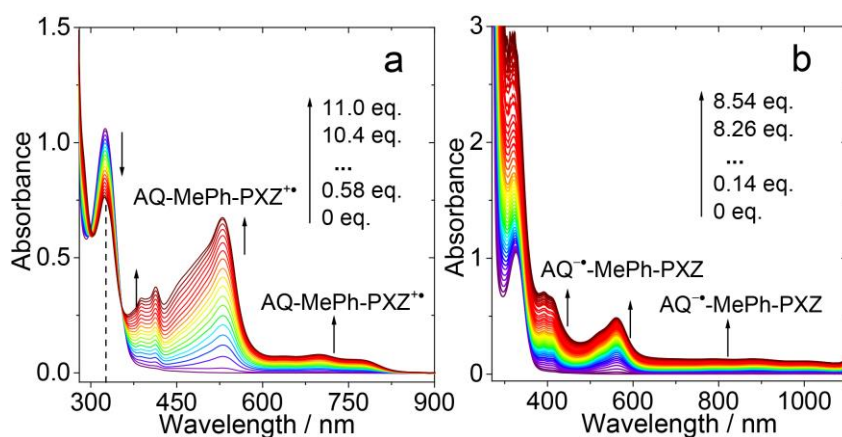

**Fig. S21** Evolution of the UV-vis absorption spectra of **AQ-MePh-PXZ** (a) in the presence of increasing amount of nitrosonium hexafluorophosphate (NO[PF<sub>6</sub>]) as oxidant in deaerated ACN.  $c = 8.5 \times 10^{-5}$  M. (b) In the presence of increasing amount of cobaltocene (CoCp<sub>2</sub>) as reductant in deaerated DMF,  $c = 1.0 \times 10^{-4}$  M. 20 °C.

## 9. Nanosecond Time-Resolved Transient Absorption Spectra

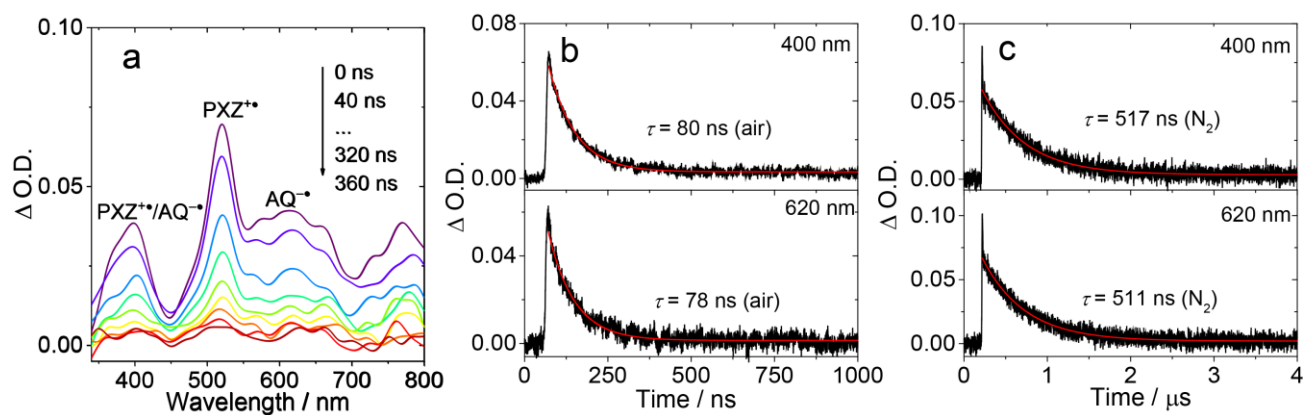

**Fig. S22** (a) Nanosecond transient absorption spectra of **AQ-PXZ** in aerated CHX. Decay traces of **AQ-PXZ** at 400 nm and 620 nm (b) in aerated CHX and (c) in deaerated CHX,  $c = 1.0 \times 10^{-4}$  M, 20 °C.

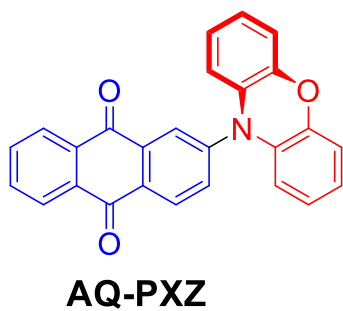

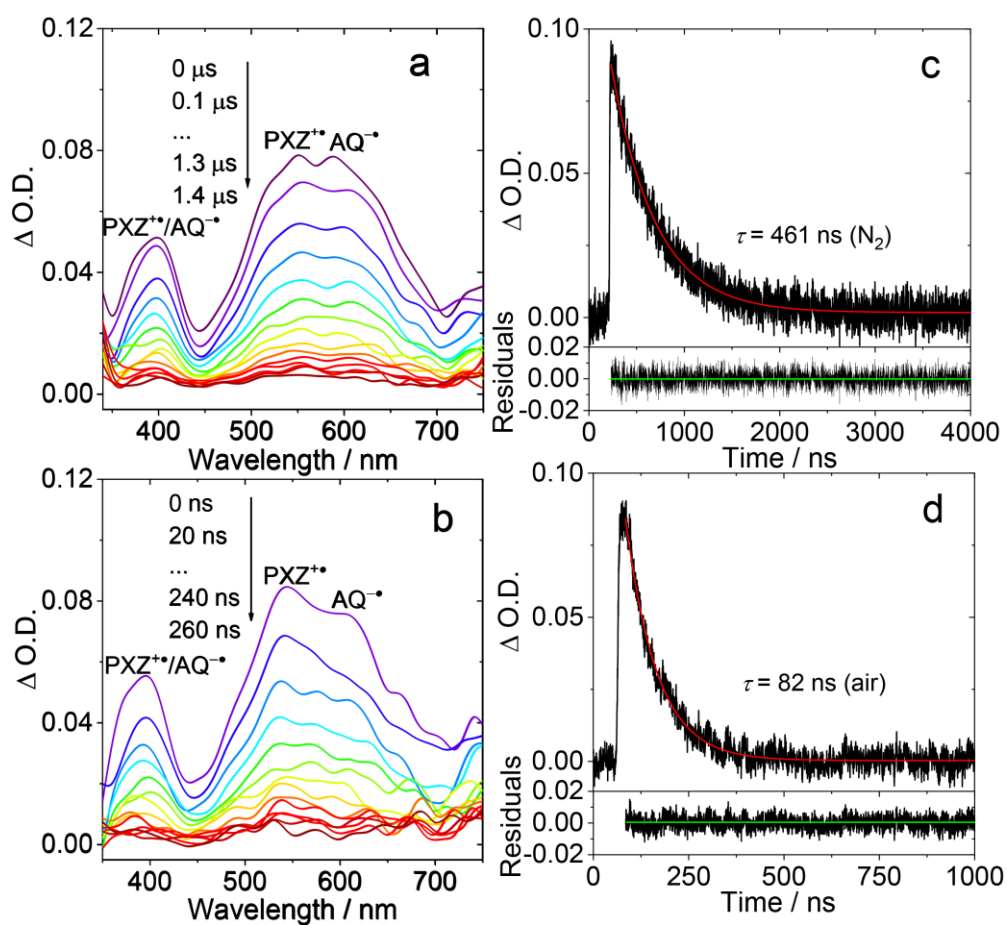

**Fig. S23** Nanosecond transient absorption spectra of **AQ-PXZ** (a) in deaerated TOL and (b) in aerated TOL. Decay traces of **AQ-PXZ** at 550 nm (c) in deaerated TOL and (d) in aerated TOL,  $\lambda_{\text{ex}} = 355$  nm,  $c = 1.0 \times 10^{-4}$  M, 20 °C.

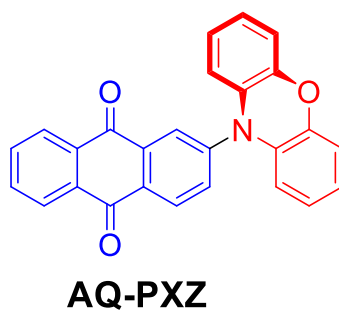

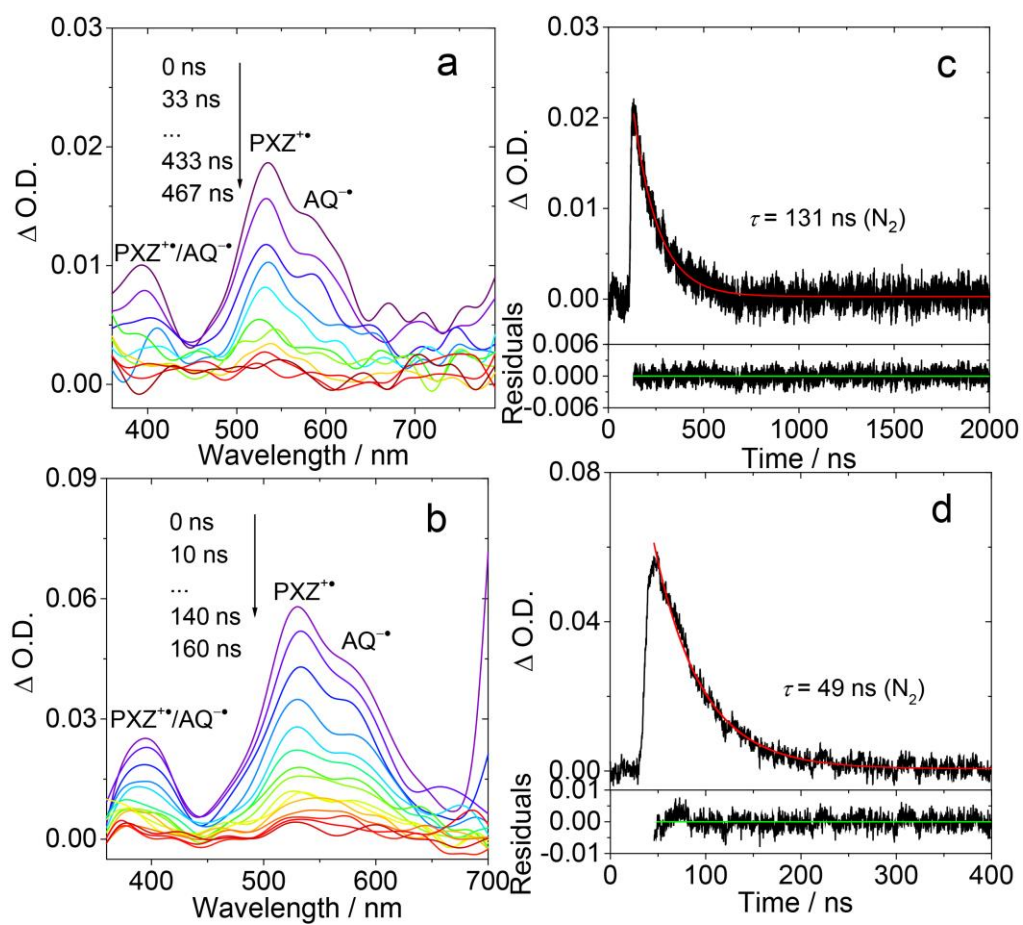

**Fig. S24** Nanosecond transient absorption spectra of **AQ-PXZ** (a) in deaerated THF and (b) in deaerated ACN. Decay traces of **AQ-PXZ** at 530 nm (c) in deaerated THF and (d) in deaerated ACN,  $\lambda_{\text{ex}} = 355 \text{ nm}$ ,  $c = 1.0 \times 10^{-4} \text{ M}$ ,  $20 \text{ }^\circ\text{C}$ .

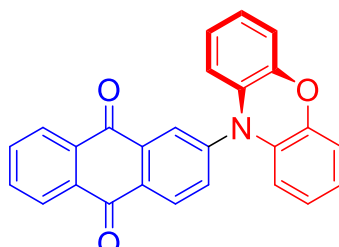

**AQ-PXZ**

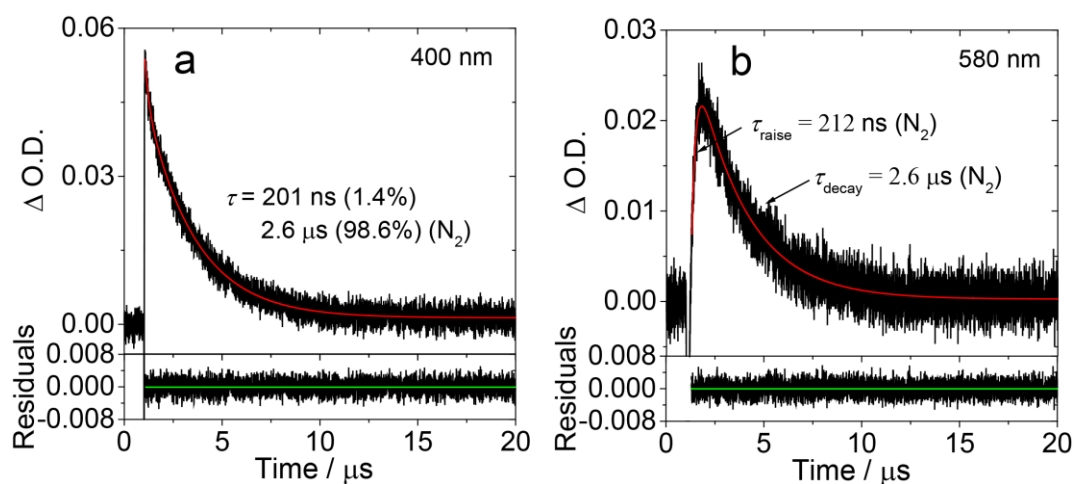

**Fig. S25** Decay traces of **AQ-MePh-PXZ** (a) at 400 nm and (b) at 580 nm in deaerated CHX,  $\lambda_{\text{ex}} = 355 \text{ nm}$ ,  $c = 2.0 \times 10^{-5} \text{ M}$ ,  $20 \text{ }^\circ\text{C}$ .

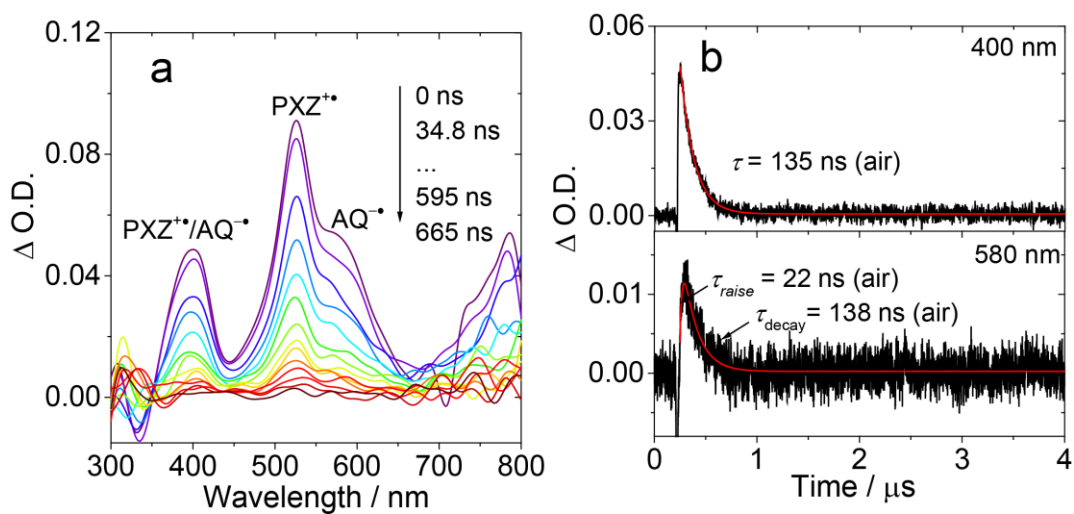

**Fig. S26** (a) Nanosecond transient absorption spectra of **AQ-MePh-PXZ** in aerated CHX. (b) Decay traces of **AQ-MePh-PXZ** at 400 nm and 580 nm in aerated CHX,  $\lambda_{\text{ex}} = 355 \text{ nm}$ ,  $c = 2.0 \times 10^{-5} \text{ M}$ ,  $20 \text{ }^\circ\text{C}$ .

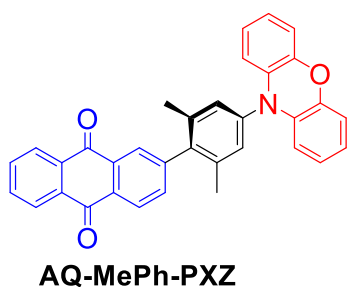

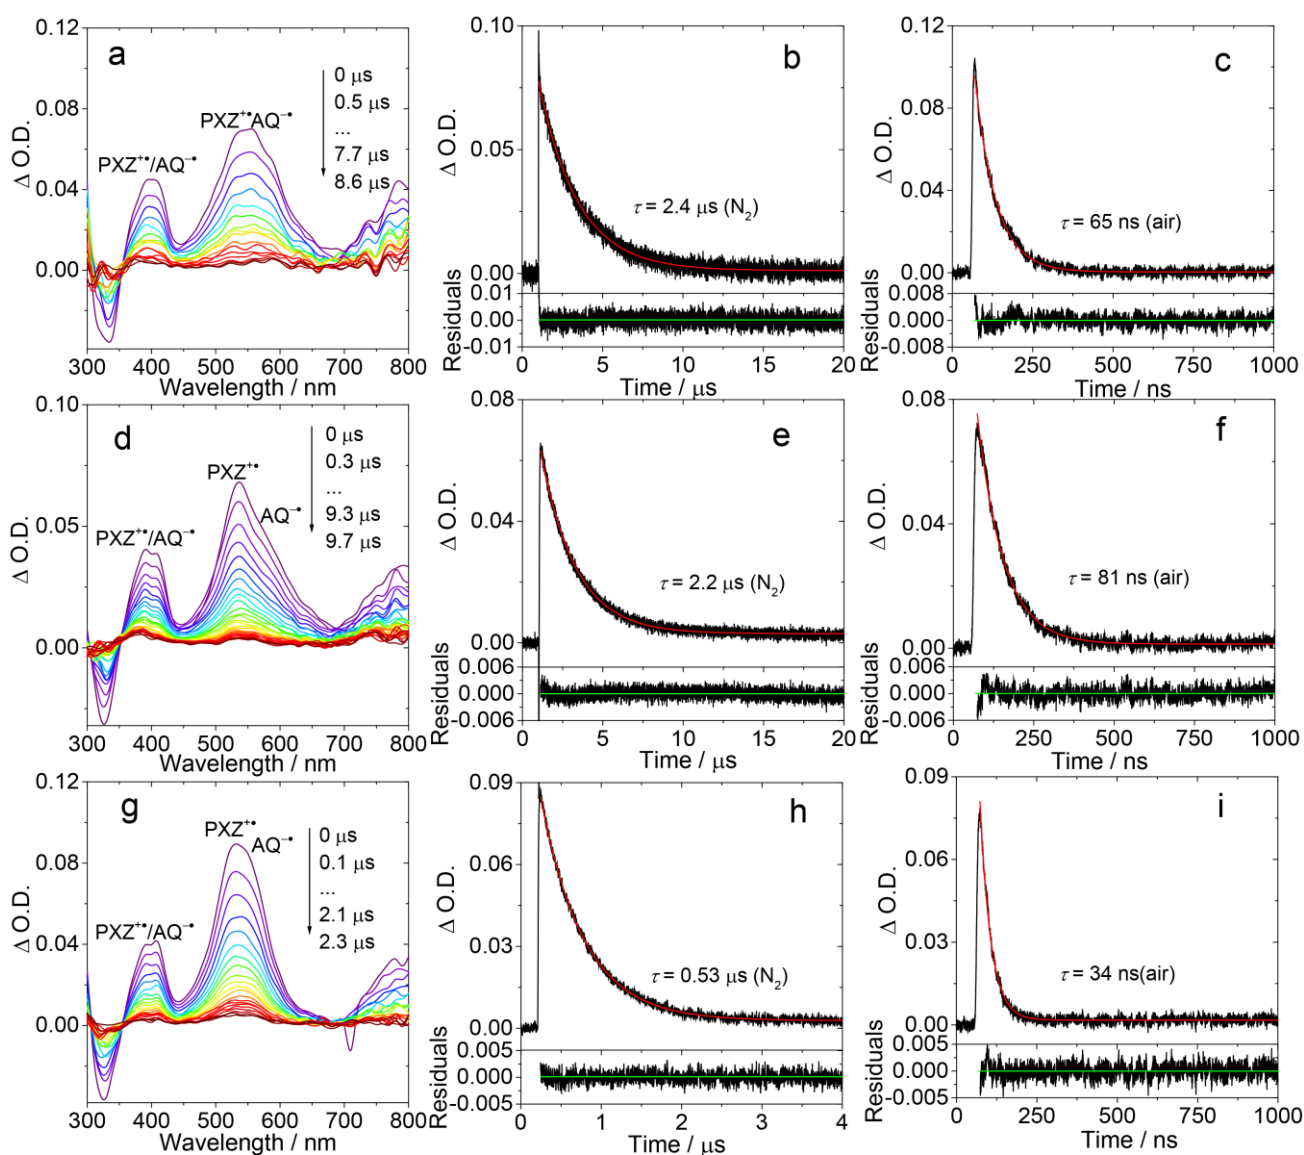

**Fig. S27** Nanosecond transient absorption spectra of **AQ-MePh-PXZ** (a) in deaerated TOL, (d) in deaerated THF and (g) in deaerated ACN. Decay traces of **AQ-MePh-PXZ** (b), (c) at 560 nm in deaerated and aerated TOL; (e), (f) at 540 nm in deaerated and aerated THF; (h), (i) at 520 nm in deaerated and aerated ACN,  $\lambda_{\text{ex}} = 355 \text{ nm}$ ,  $c = 3.0 \times 10^{-5} \text{ M}$ ,  $20 \text{ }^\circ\text{C}$ .

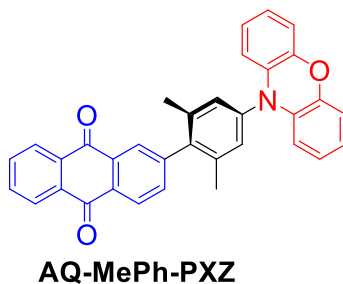



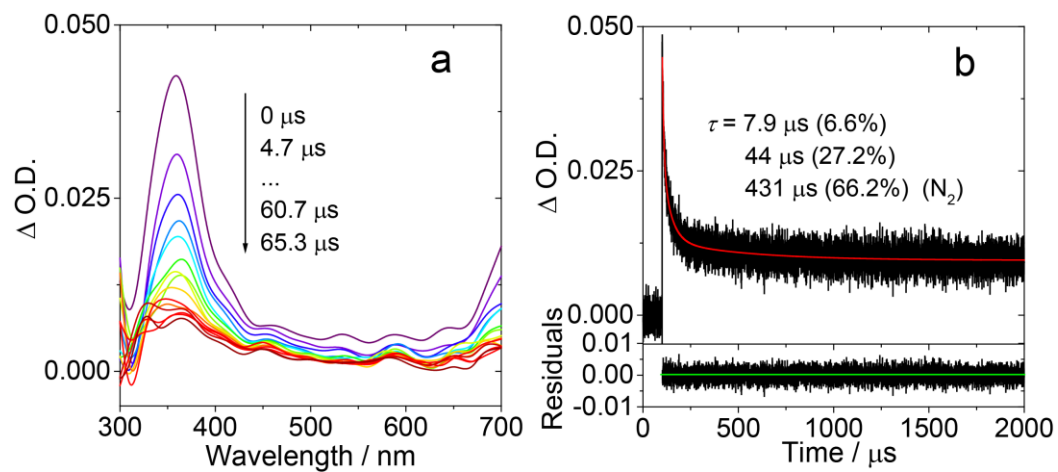

**Fig. S28** (a) Nanosecond transient absorption spectra of **AQ** in deaerated CHX. (b) Decay traces of **AQ** at 370 nm in deaerated CHX,  $\lambda_{ex} = 355$  nm,  $c = 1.0 \times 10^{-4}$  M, 20 °C.

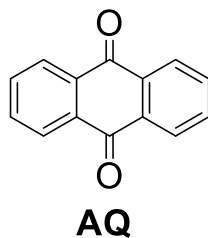

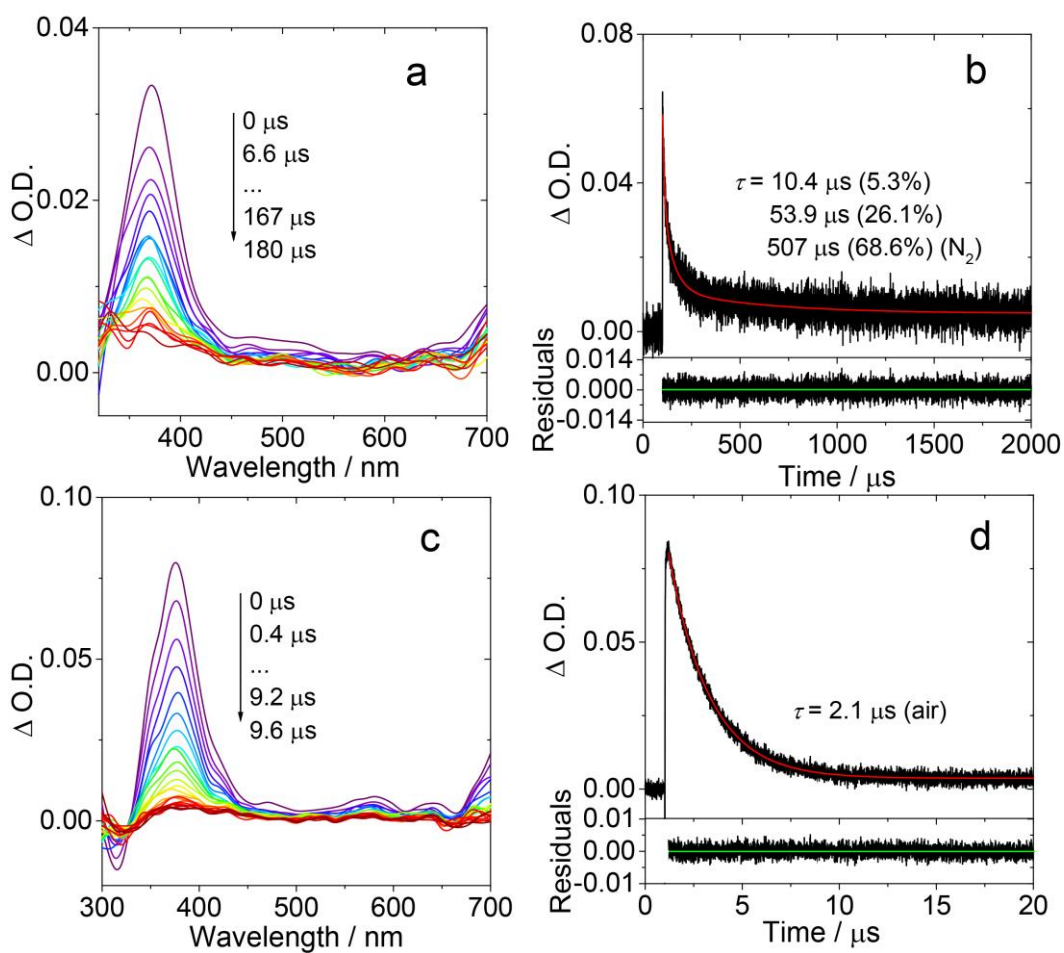

**Fig. S29** Nanosecond transient absorption spectra of **AQ-MePh-Br** (a) in deaerated CHX and (c) in aerated CHX. Decay traces of **AQ-MePh-Br** at 370 nm (b) in deaerated and (d) in aerated CHX,  $\lambda_{\text{ex}} = 355 \text{ nm}$ ,  $c = 3.0 \times 10^{-5} \text{ M}$ ,  $20 \text{ }^\circ\text{C}$ .

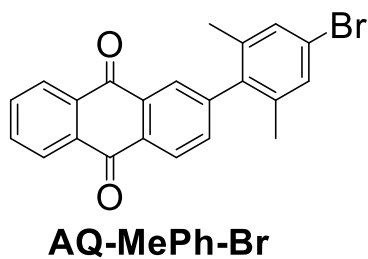

## 10. DFT Calculations

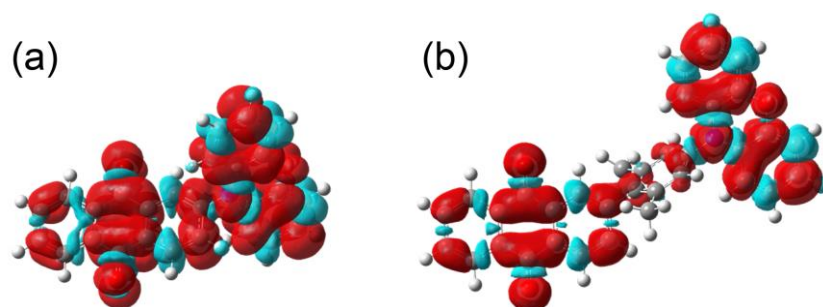

**Fig. S30** Electron spin density surfaces of the triplet state of (a) **AQ-PXZ** and (b) **AQ-MePh-PXZ** in CHX (PCM model) at the optimized triplet state geometry, isovalue = 0.0004. Calculated at tuned CAM-B3LYP/6-31G (d) level with Gaussian 16.

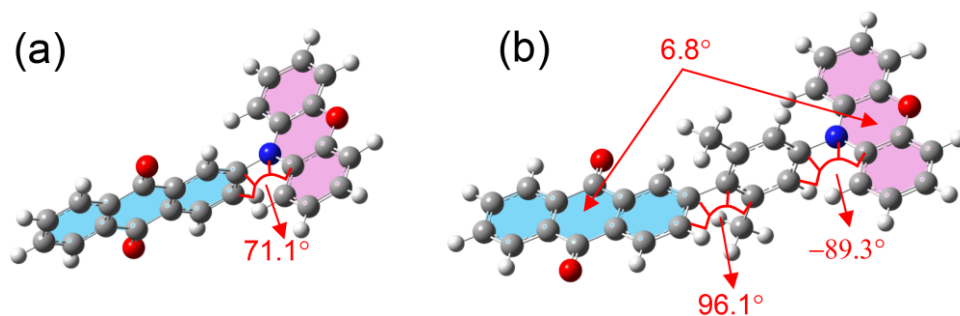

**Fig. S31** Optimized ground state ( $S_0$  state) geometries of **AQ-PXZ** and **AQ-MePh-PXZ** in CHX. Calculated at tuned CAM-B3LYP/6-31G (d) level with Gaussian 16. The dihedral angles between AQ and PXZ are presented.

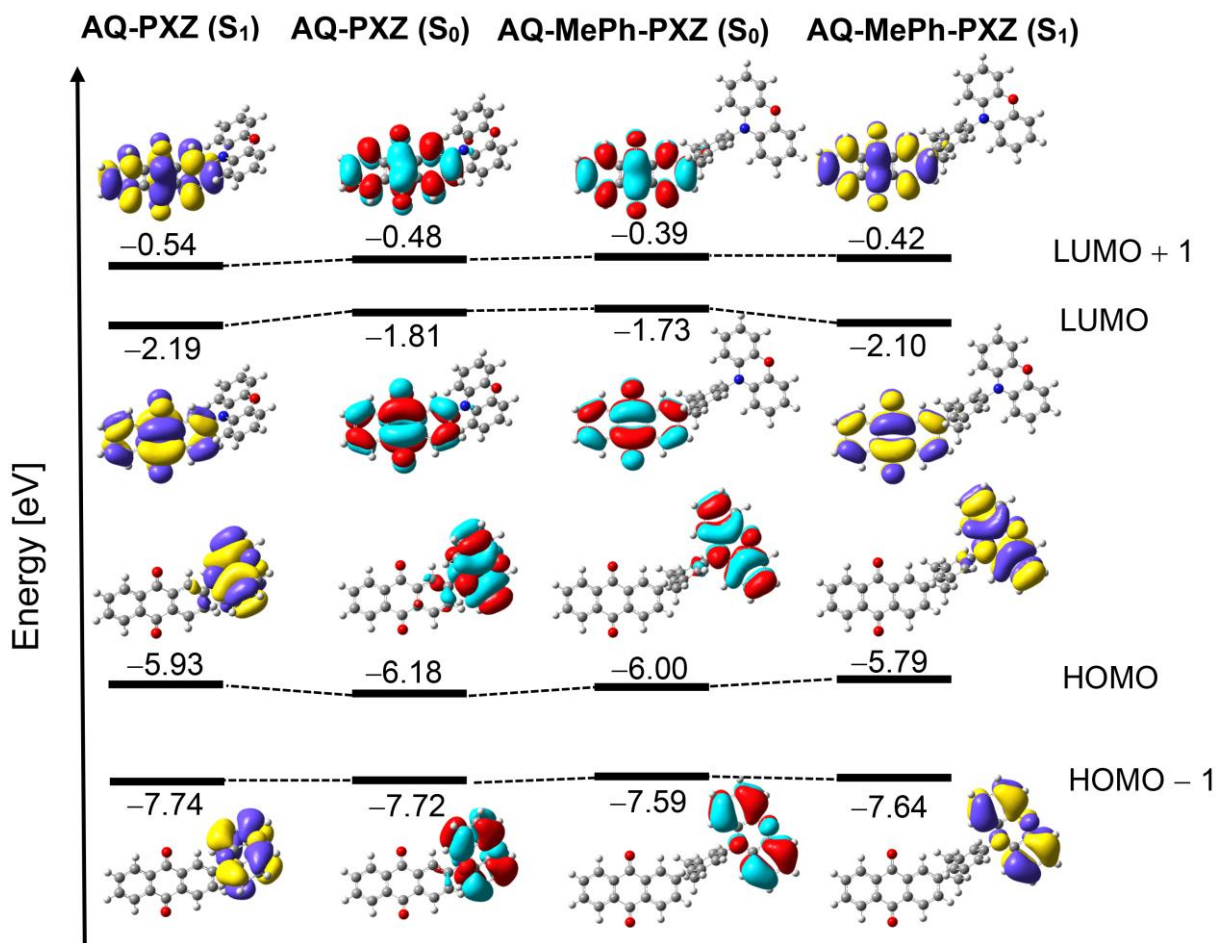

**Fig S32.** Selected frontier molecular orbitals of **AQ-PXZ** and **AQ-MePh-PXZ** at the ground state (S<sub>0</sub>) and singlet excited state (S<sub>1</sub>) calculated by DFT at tuned CAM-B3LYP/6-31G (d) in CHX, isovalue = 0.02. The energy levels of the orbits are presented (in eV).

**Table S5. Electronic Excitation Energies (eV) and Corresponding Oscillator Strengths ( $f$ ), Main Configurations, and CI Coefficients of the Low-Lying Electronic Excited States of AQ-PXZ in CHX (PCM model) were Presented. All Parameters were Calculated by TDDFT// tuned CAM-B3LYP/6-31G(d), Based on the DFT// tuned CAM-B3LYP/6-31G(d)-Optimized Ground State Geometries.**

|            | Electronic transition <sup>a</sup> | Energy <sup>b</sup> | $f$ <sup>c</sup> | CI <sup>d</sup> | Composition <sub>e</sub> | Assignment      |
|------------|------------------------------------|---------------------|------------------|-----------------|--------------------------|-----------------|
| Excitation | S <sub>0</sub> →T <sub>1</sub>     | 1.82 eV/681 nm      | 0.000            | 0.687           | H → L                    | <sup>3</sup> CT |
|            | S <sub>0</sub> →T <sub>2</sub>     | 2.61 eV/476 nm      | 0.000            | 0.664           | H-4 → L                  | <sup>3</sup> AQ |
|            | S <sub>0</sub> →T <sub>3</sub>     | 2.79 eV/444 nm      | 0.000            | 0.499           | H → L+1                  | <sup>3</sup> CT |
|            | S <sub>0</sub> →T <sub>4</sub>     | 2.85 eV/435 nm      | 0.000            | 0.633           | H-7 → L                  | <sup>3</sup> AQ |

<sup>a</sup>TDDFT// tuned CAM-B3LYP/6-31G(d), based on the DFT// tuned CAM-B3LYP/6-31G(d)-optimized ground state geometries in CHX (PCM model). <sup>b</sup>Only the selected low lying excited states are presented. <sup>c</sup>Oscillator strengths, no spin-orbital coupling effect was considered; thus, the  $f$  values are zero. <sup>d</sup>CI coefficients are in absolute values. <sup>e</sup>TDDFT// tuned- CAM-B3LYP/6-31G(d)-optimized excited state geometries.

**Table S6. Electronic Excitation Energies (eV) and Corresponding Oscillator Strengths ( $f$ ), Main Configurations, and CI Coefficients of the Low-Lying Electronic Excited States of AQ-MePh-PXZ in CHX (PCM model) were Presented. All Parameters were Calculated by TDDFT// tuned CAM-B3LYP/6-31G(d), Based on the DFT// tuned CAM-B3LYP/6-31G(d)-Optimized Ground State Geometries.**

|            | Electronic transition <sup>a</sup> | Energy <sup>b</sup> | $f$ <sup>c</sup> | CI <sup>d</sup> | Composition <sup>e</sup> | Assignment      |
|------------|------------------------------------|---------------------|------------------|-----------------|--------------------------|-----------------|
| Excitation | S <sub>0</sub> →T <sub>1</sub>     | 2.34 eV/530 nm      | 0.000            | 0.705           | H → L                    | <sup>3</sup> CT |
|            | S <sub>0</sub> →T <sub>2</sub>     | 2.59 eV/478 nm      | 0.000            | 0.636           | H-6 → L                  | <sup>3</sup> CT |
|            | S <sub>0</sub> →T <sub>3</sub>     | 2.84 eV/436 nm      | 0.000            | 0.650           | H-10 → L                 | <sup>3</sup> AQ |
|            | S <sub>0</sub> →T <sub>4</sub>     | 2.86 eV/434 nm      | 0.000            | 0.584           | H → L+6                  | <sup>3</sup> CT |

<sup>a</sup>TDDFT// tuned CAM-B3LYP/6-31G(d), based on the DFT// tuned CAM-B3LYP/6-31G(d)-optimized ground state geometries in CHX (PCM model). <sup>b</sup>Only the selected low lying excited states are presented. <sup>c</sup>Oscillator strengths, no spin-orbital coupling effect was considered; thus, the  $f$  values are zero. <sup>d</sup>CI coefficients are in absolute values. <sup>e</sup>TDDFT// tuned CAM-B3LYP/6-31G(d)-optimized excited state geometries.

## 11. Coordinates of the Optimized Geometries of the Compounds

### AQ-PXZ

Calculation Type = FREQ

Calculation Method = RCAM-B3LYP

Basis Set = 6-31G(d)

Charge = 0

Spin = Singlet

Solvation = scrf=solvent=cyclohexane

E(RCAM-B3LYP) = -1279.583717 Hartree

RMS Gradient Norm = 0.002233 Hartree/Bohr

Imaginary Freq = 0

Dipole Moment = 2.393924 Debye

Point Group = C1

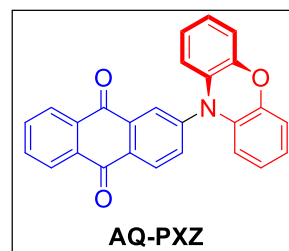

0 1

|   |            |             |             |
|---|------------|-------------|-------------|
| C | 2.55465700 | 3.59283100  | 0.78788500  |
| C | 1.92641100 | 2.34938800  | 0.67912500  |
| C | 2.64693800 | 1.21222500  | 0.30213400  |
| C | 4.02452100 | 1.35453300  | 0.05988500  |
| C | 4.64891300 | 2.58806900  | 0.16504500  |
| C | 3.91467200 | 3.71941700  | 0.52842500  |
| C | 4.23339400 | -0.95342000 | -0.43404800 |
| C | 2.86027800 | -1.15741600 | -0.21277600 |
| C | 2.34388100 | -2.43880000 | -0.42757000 |
| H | 1.28400600 | -2.61787800 | -0.28610300 |
| C | 3.17555100 | -3.48946400 | -0.82402700 |
| C | 4.53466100 | -3.27426400 | -1.02343800 |
| C | 5.05953200 | -1.99427200 | -0.83004600 |
| H | 1.96640900 | 4.45750300  | 1.08027000  |
| H | 0.86699300 | 2.26428500  | 0.89245400  |
| H | 5.71452400 | 2.63994900  | -0.03618800 |
| H | 4.40940300 | 4.68227300  | 0.60921900  |

|   |             |             |             |
|---|-------------|-------------|-------------|
| H | 2.74496400  | -4.47432700 | -0.97854300 |
| H | 5.18718800  | -4.08545100 | -1.33097000 |
| H | 6.11270000  | -1.78029400 | -0.98421000 |
| N | 2.05947300  | -0.06612200 | 0.18664800  |
| C | -6.80246600 | 0.03316600  | -0.27641000 |
| C | -5.84911000 | -0.47870300 | 0.59919500  |
| C | -4.48804100 | -0.29338800 | 0.34075900  |
| C | -4.08504500 | 0.41271300  | -0.80849600 |
| C | -5.04860900 | 0.92315700  | -1.68305600 |
| C | -6.40202000 | 0.73449100  | -1.41822300 |
| C | -3.48992600 | -0.85301600 | 1.29287800  |
| C | -2.64518400 | 0.62981800  | -1.11579200 |
| C | -1.64541800 | 0.07174100  | -0.16005700 |
| C | -2.04861800 | -0.63687100 | 0.98569000  |
| C | -1.08246800 | -1.14850100 | 1.85725400  |
| H | -1.41371800 | -1.68675300 | 2.73928500  |
| C | 0.26877700  | -0.95371800 | 1.59773800  |
| C | 0.67266300  | -0.25314200 | 0.45159500  |
| C | -0.28676600 | 0.25358100  | -0.42532000 |
| H | -7.85910800 | -0.11304700 | -0.07171200 |
| H | -6.13532700 | -1.02671200 | 1.49107800  |
| H | -4.71339400 | 1.46370800  | -2.56234700 |
| H | -7.14760600 | 1.13304000  | -2.10013000 |
| H | 1.02446300  | -1.33965900 | 2.27526200  |
| H | 0.00789100  | 0.79299200  | -1.31972900 |
| O | -2.28975500 | 1.24487400  | -2.11478500 |
| O | -3.83801900 | -1.47064700 | 2.29354400  |
| O | 4.82617800  | 0.28231000  | -0.27554300 |



## AQ-MePh-PXZ

Calculation Type = FREQ

Calculation Method = RCAM-B3LYP

Basis Set = 6-31G(d)

Charge = 0

Spin = Singlet

Solvation = scrf=solvent=cyclohexane

E(RCAM-B3LYP) = -1589.087975 Hartree

RMS Gradient Norm = 0.002052 Hartree/Bohr

Imaginary Freq = 0

Dipole Moment = 3.312292 Debye

Point Group = C1

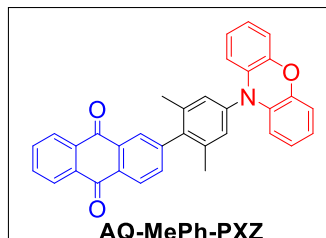

0 1

|   |            |             |             |
|---|------------|-------------|-------------|
| C | 5.42036900 | -3.38352600 | -0.18862200 |
| C | 4.50702900 | -2.32745400 | -0.12127100 |
| C | 4.94822400 | -1.00247200 | -0.06071400 |
| C | 6.33465000 | -0.76468300 | -0.06957200 |
| C | 7.24105900 | -1.81094600 | -0.13724800 |
| C | 6.78765800 | -3.13202400 | -0.19712300 |
| C | 5.98130700 | 1.57794300  | 0.03988600  |
| C | 4.58670400 | 1.39544000  | 0.05116200  |
| C | 3.77412800 | 2.53147700  | 0.10490400  |
| H | 2.69651600 | 2.41029300  | 0.11433700  |
| C | 4.33525700 | 3.81106200  | 0.14674400  |
| C | 5.71579800 | 3.97491700  | 0.13465700  |
| C | 6.53878400 | 2.84616700  | 0.08037100  |
| H | 5.04797800 | -4.40283500 | -0.23432100 |
| H | 3.44163400 | -2.52974900 | -0.11515700 |
| H | 8.29994900 | -1.57096100 | -0.14135300 |
| H | 7.50306600 | -3.94694600 | -0.24943500 |
| H | 3.67866000 | 4.67523300  | 0.18859500  |
| H | 6.15884100 | 4.96553400  | 0.16678800  |

|   |              |             |             |
|---|--------------|-------------|-------------|
| H | 7.62125500   | 2.92987200  | 0.06925000  |
| N | 4.06530000   | 0.08975900  | 0.00928100  |
| C | 2.65008900   | -0.12384000 | 0.01842400  |
| C | 1.97651600   | -0.27603600 | 1.22907600  |
| C | 1.94474300   | -0.17884500 | -1.18253500 |
| C | 0.59479000   | -0.48494300 | 1.25665100  |
| H | 2.53900100   | -0.22854100 | 2.15765000  |
| C | 0.56233800   | -0.38485000 | -1.19052500 |
| H | 2.48302700   | -0.05951700 | -2.11898100 |
| C | -0.11047900  | -0.53874100 | 0.03796400  |
| C | -2.47507200  | 0.31692400  | -0.02317100 |
| C | -3.85696100  | 0.11310500  | -0.01225900 |
| C | -1.58950000  | -0.76208400 | 0.04870300  |
| C | -4.76097400  | 1.29576700  | -0.08980500 |
| C | -4.37178800  | -1.19282600 | 0.07112000  |
| C | -2.11672200  | -2.06185700 | 0.13179900  |
| C | -6.22826500  | 1.04208400  | -0.07513400 |
| C | -5.83876600  | -1.44714100 | 0.08486600  |
| C | -3.49083200  | -2.27532100 | 0.14246000  |
| H | -1.43644400  | -2.90779800 | 0.18612000  |
| C | -7.10457200  | 2.12892100  | -0.14580900 |
| C | -6.74234700  | -0.26570100 | 0.00828500  |
| H | -3.90570400  | -3.27623000 | 0.20519500  |
| C | -8.48048500  | 1.91886600  | -0.13365400 |
| H | -6.68402500  | 3.12731500  | -0.20953500 |
| C | -8.12534200  | -0.46805900 | 0.01992500  |
| C | -8.99120500  | 0.61950600  | -0.05069700 |
| H | -9.15793400  | 2.76617000  | -0.18874600 |
| H | -8.49706100  | -1.48554000 | 0.08482500  |
| H | -10.06529200 | 0.45779400  | -0.04133600 |
| O | -4.31158600  | 2.43442700  | -0.16304900 |
| O | -6.28507500  | -2.58729800 | 0.15681700  |
| C | -0.18298600  | -0.44216800 | -2.50258800 |
| H | -0.73692600  | -1.38214400 | -2.60991300 |
| H | -0.91770100  | 0.36760200  | -2.58442500 |
| H | 0.50820900   | -0.35650700 | -3.34596500 |
| C | -0.11713900  | -0.63984600 | 2.57935100  |
| H | -0.90649200  | 0.11132500  | 2.70015300  |

|   |             |             |             |
|---|-------------|-------------|-------------|
| H | -0.59974800 | -1.62048800 | 2.66683200  |
| H | 0.58355000  | -0.53321300 | 3.41241300  |
| H | -2.10474100 | 1.33575400  | -0.08683000 |
| O | 6.85881600  | 0.51191500  | -0.00937400 |

## 12. Reference

- (1) T. Lu Optdftw Program V1.0. <http://sobereva.com/346>.
- (2) H. Noda, X. K. Chen, H. Nakanotani, T. Hosokai, M. Miyajima, N. Notsuka, Y. Kashima, J. L. Bredas and C. Adachi, *Nat. Mater.*, 2019, **18**, 1084–1090.
- (3) M. J. Frisch, G. W. Trucks, H. B. Schlegel, G. E. Scuseria, M. A. Robb, J. R. Cheeseman, G. Scalmani, V. Barone, G. A. Petersson, H. Nakatsuji, X. Li, M. Caricato, A. V. Marenich, J. Bloino, B. G. Janesko, R. Gomperts, B. Mennucci, H. P. Hratchian, J. V. Ortiz, A. F. Izmaylov, J. L. Sonnenberg, D. Williams-Young, F. Ding, F. Lipparini, F. Egidi, J. Goings, B. Peng, A. Petrone, T. Henderson, D. Ranasinghe, V. G. Zakrzewski, J. Gao, N. Rega, G. Zheng, W. Liang, M. Hada, M. Ehara, K. Toyota, R. Fukuda, J. Hasegawa, M. Ishida, T. Nakajima, Y. Honda, O. Kitao, H. Nakai, T. Vreven, K. Throssell, J. A. Montgomery, Jr., J. E. Peralta, F. Ogliaro, M. J. Bearpark, J. J. Heyd, E. N. Brothers, K. N. Kudin, V. N. Staroverov, T. A. Keith, R. Kobayashi, J. Normand, K. Raghavachari, A. P. Rendell, J. C. Burant, S. S. Iyengar, J. Tomasi, M. Cossi, J. M. Millam, M. Klene, C. Adamo, R. Cammi, J. W. Ochterski, R. L. Martin, K. Morokuma, O. Farkas, J. B. Foresman, and D. J. Fox, *Gaussian 16 Rev. B. 01*, Gaussian Inc.: Wallingford, CT, 2016.
- (4) Y. Dong, A. A. Sukhanov, J. Zhao, A. Elmali, X. Li, B. Dick, A. Karatay and V. K. Voronkova, *J. Phys. Chem. C*, 2019, **123**, 22793–22811.
- (5) M. Montalti, A. Credi, L. Prodi and M. T. Gandolfi, *Handbook of Photochemistry*, 3rd ed.; CRC Press: Boca Raton, 2006.
- (6) Z. Wang and J. Zhao, *Org. Lett.*, 2017, **19**, 4492–4495.
- (7) R. Ziessel, B. D. Allen, D. B. Rewinska and A. Harriman, *Chem. –Eur. J.*, 2009, **15**, 7382–7393.
- (8) W.-J. Shi, M. E. El-Khouly, K. Ohkubo, S. Fukuzumi and D. K. P. Ng, *Chem. –Eur. J.*, 2013, **19**, 11332–11341.
